# Supplementary material for: Antidepressants act by inducing autophagy controlled by sphingomyelin–ceramide
Source: PubMed Central journal article supplement (PMC6294742; doi:10.1038/s41380-018-0090-9), 2018-07-23

# Supplementary Fig. 1

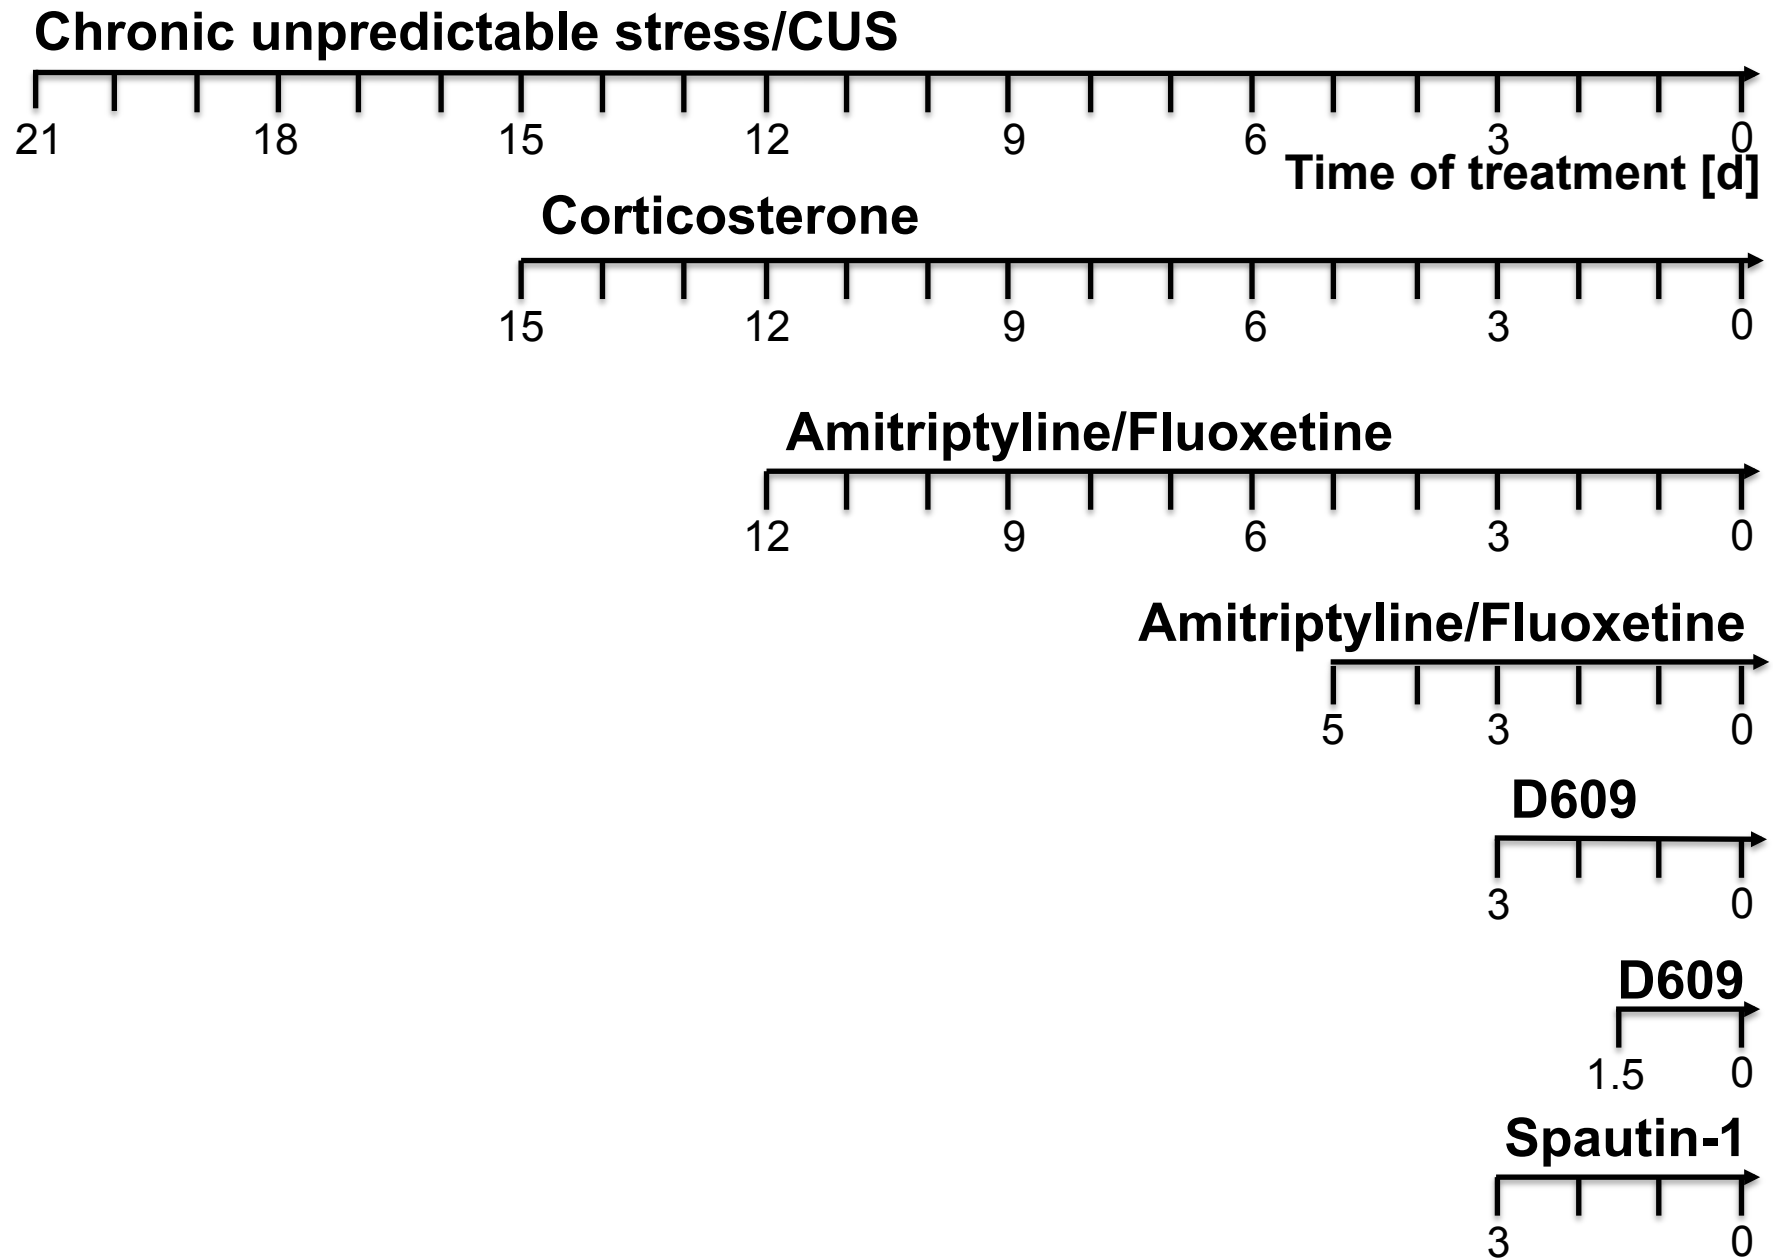

# Supplementary Figure 2

**a**

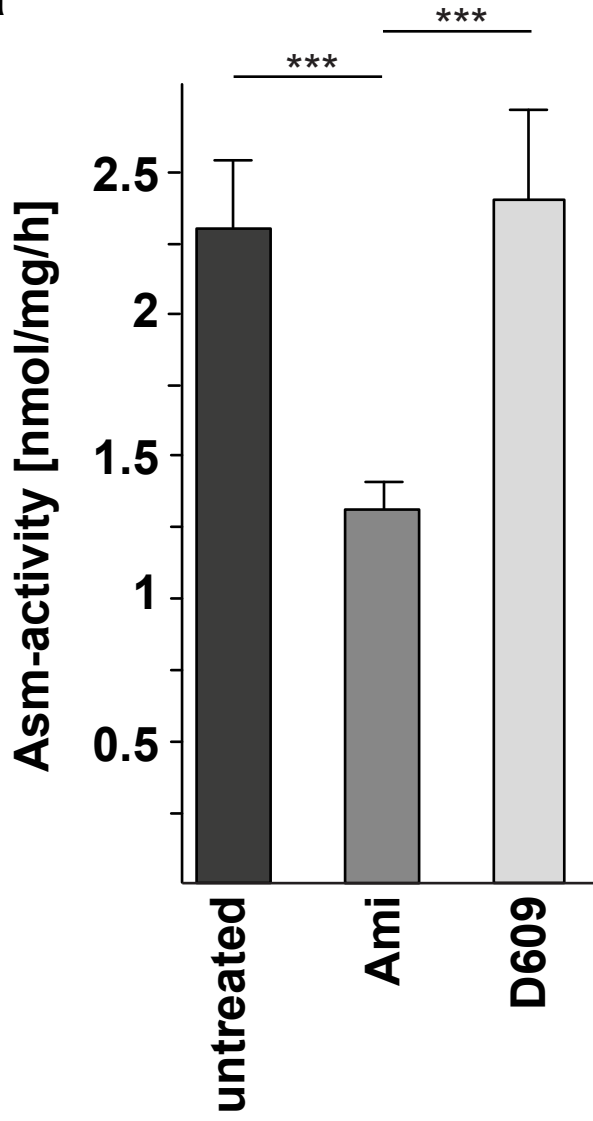

**b**

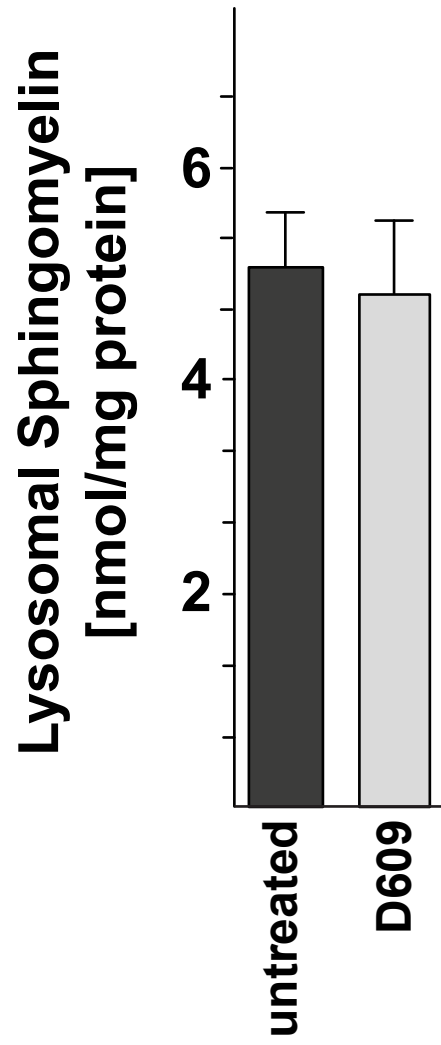

# Supplementary Fig. 3

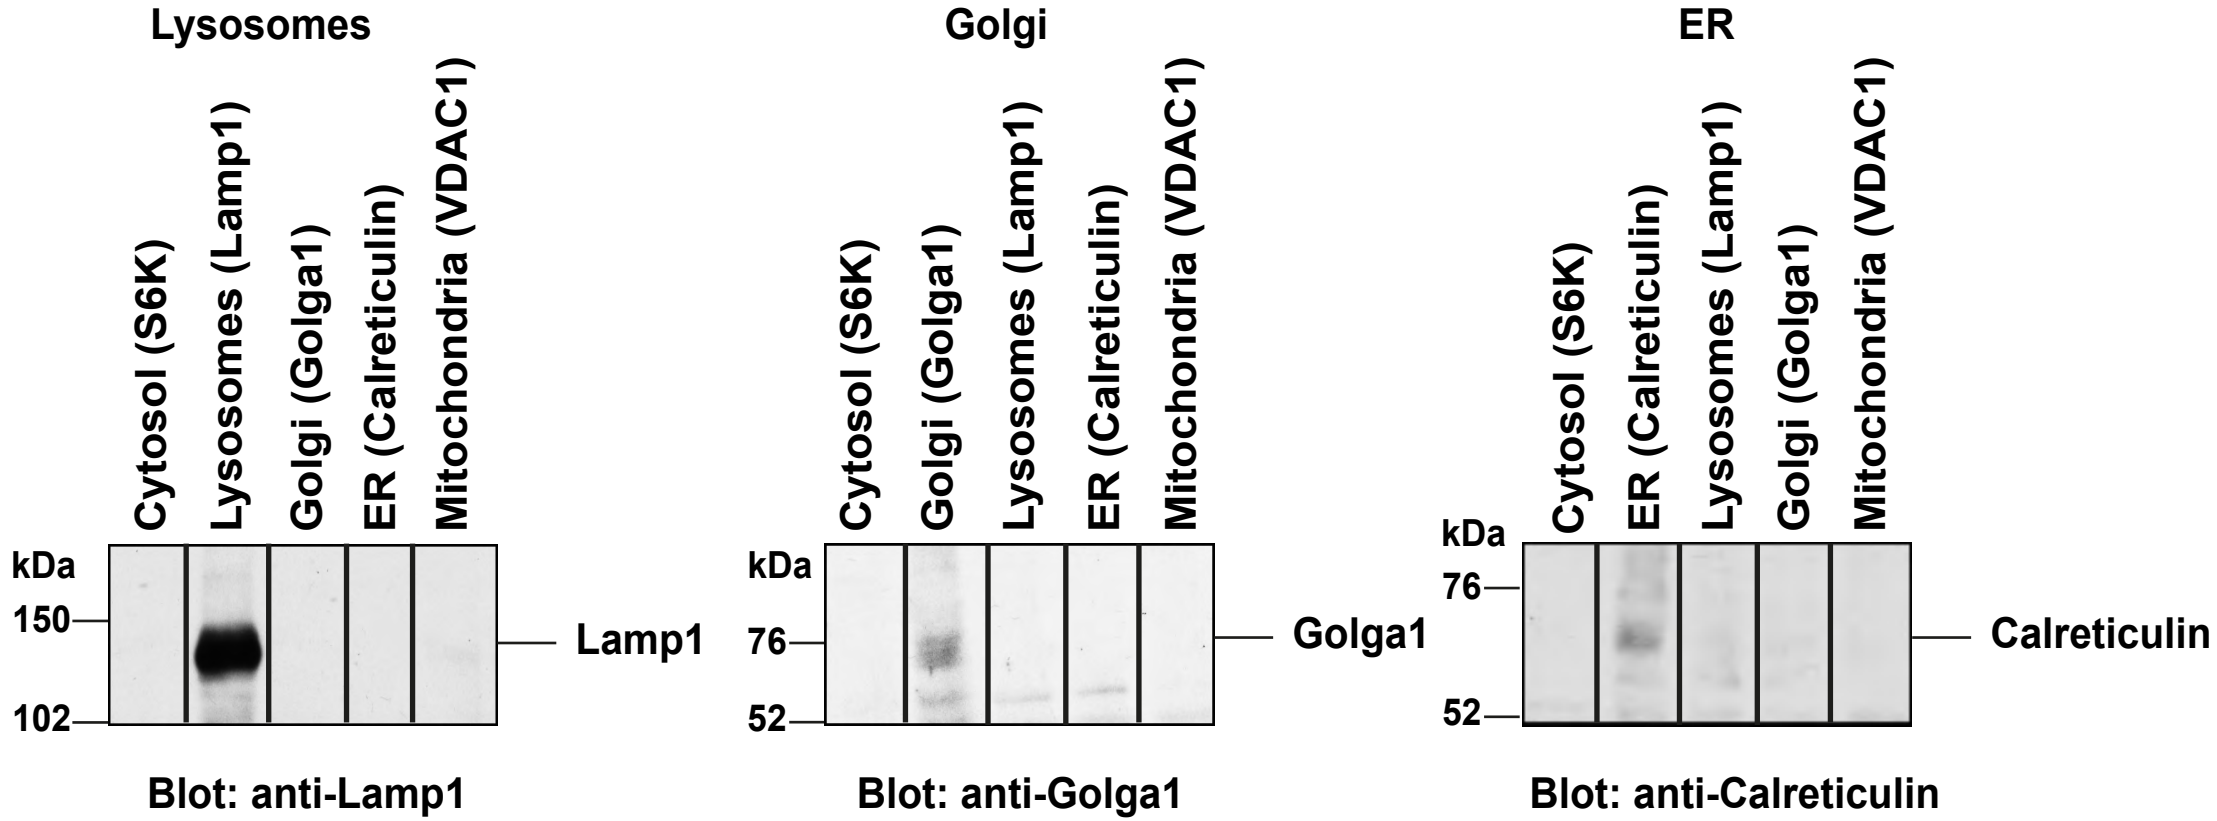

Supplementary Fig. 4

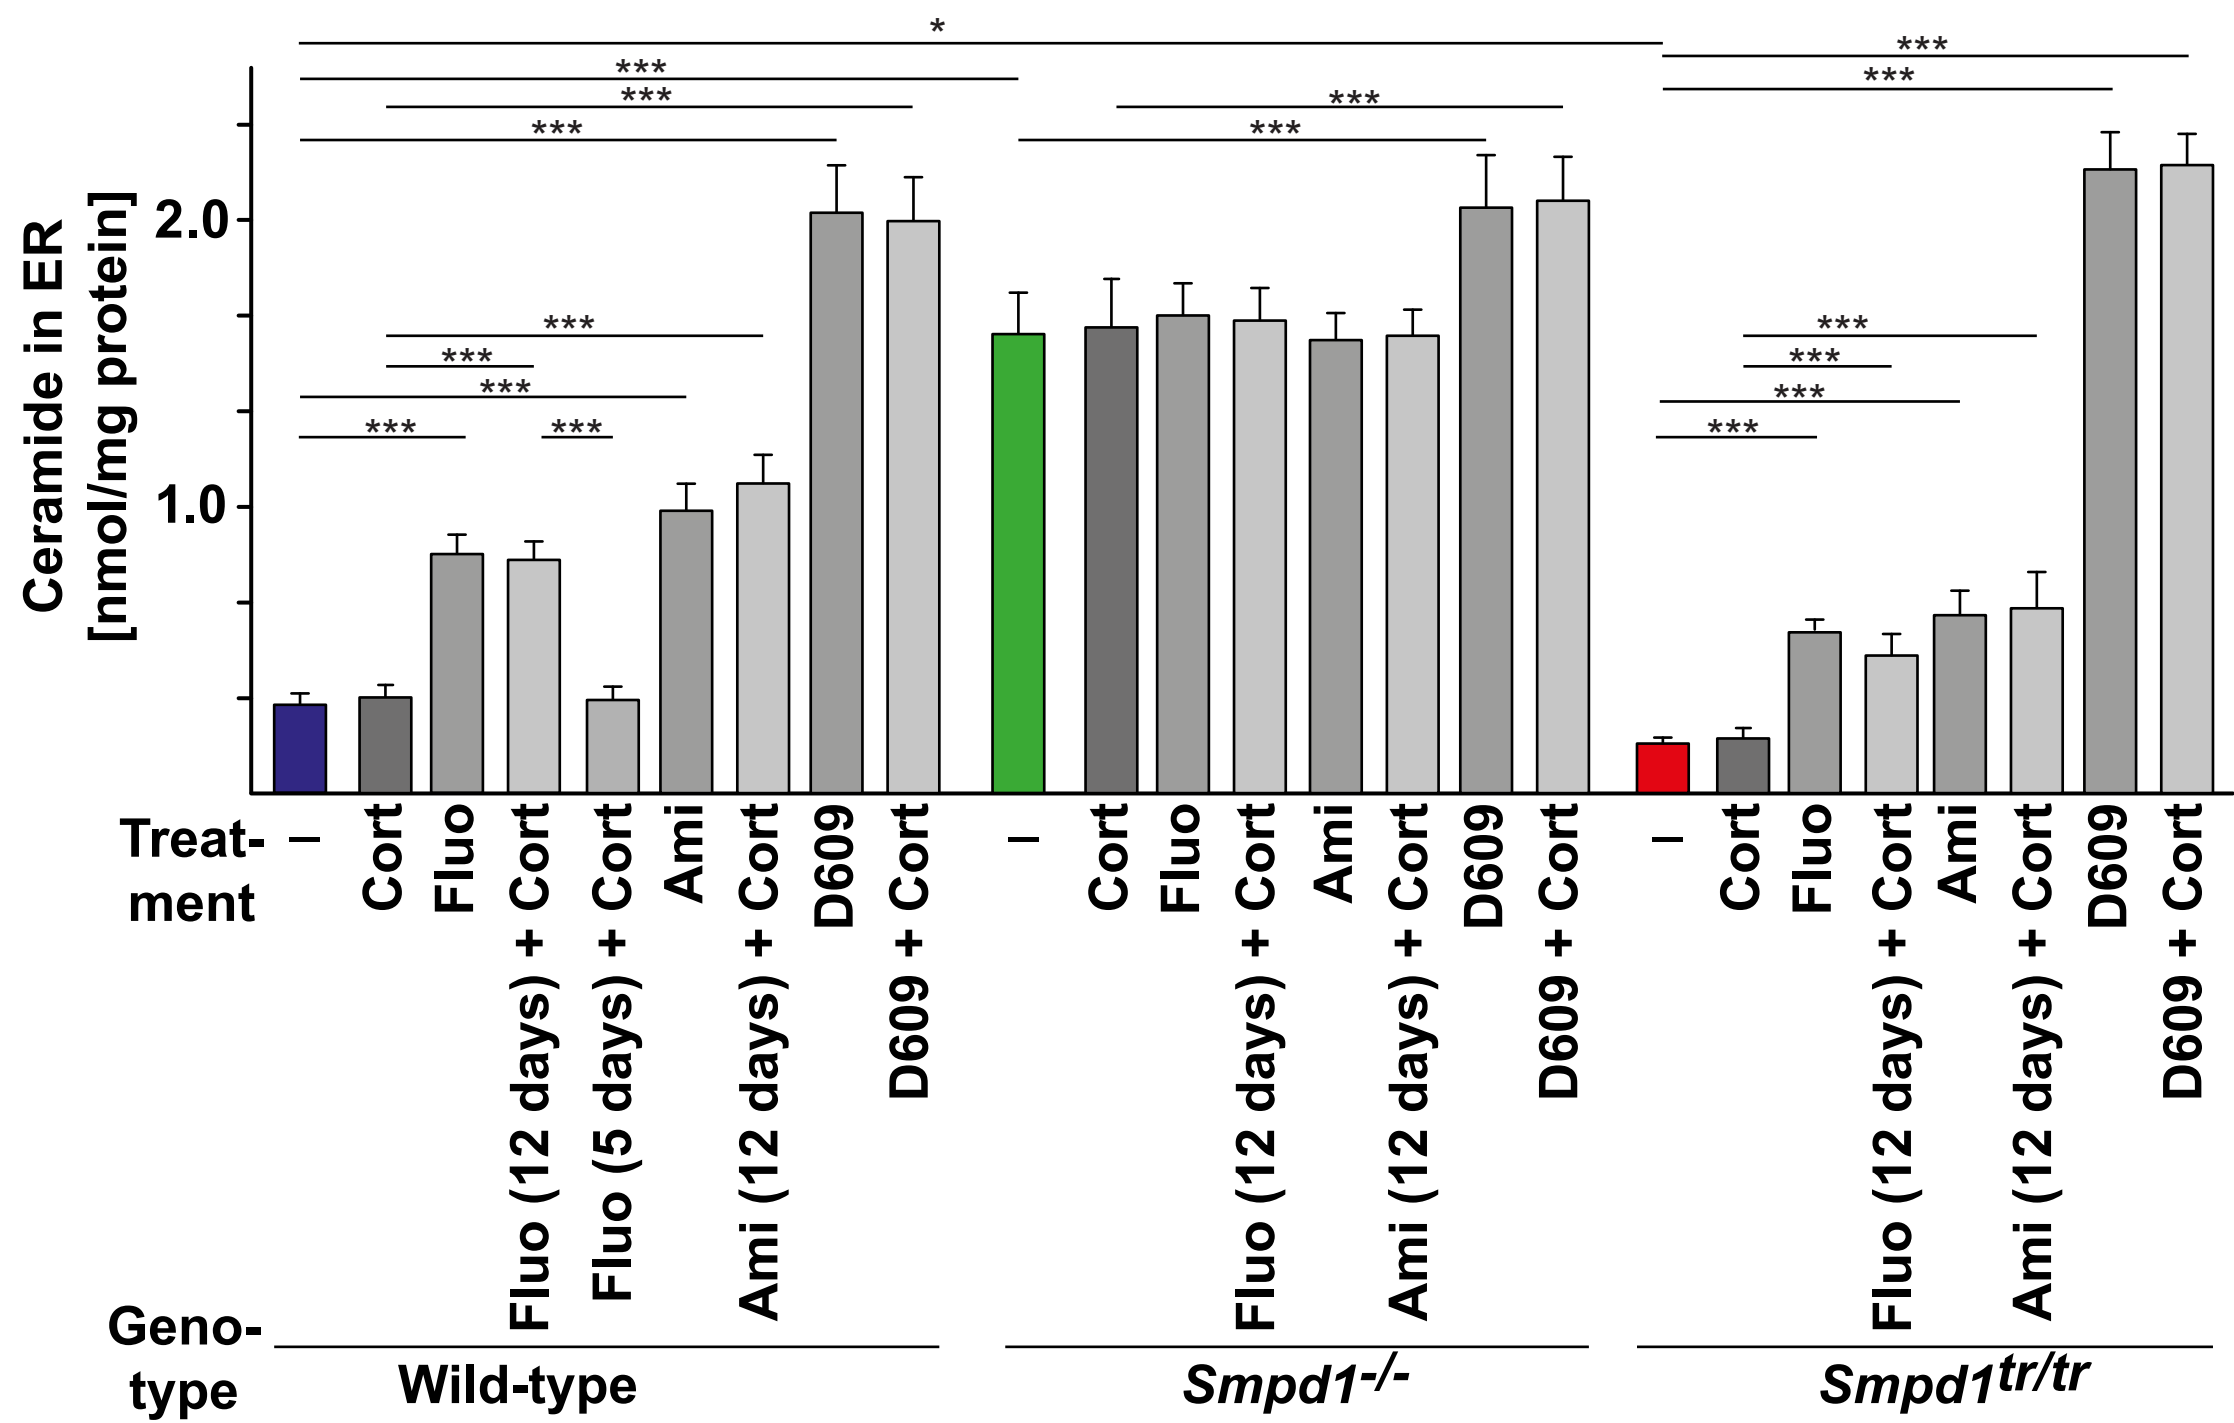

Supplementary Fig. 5a

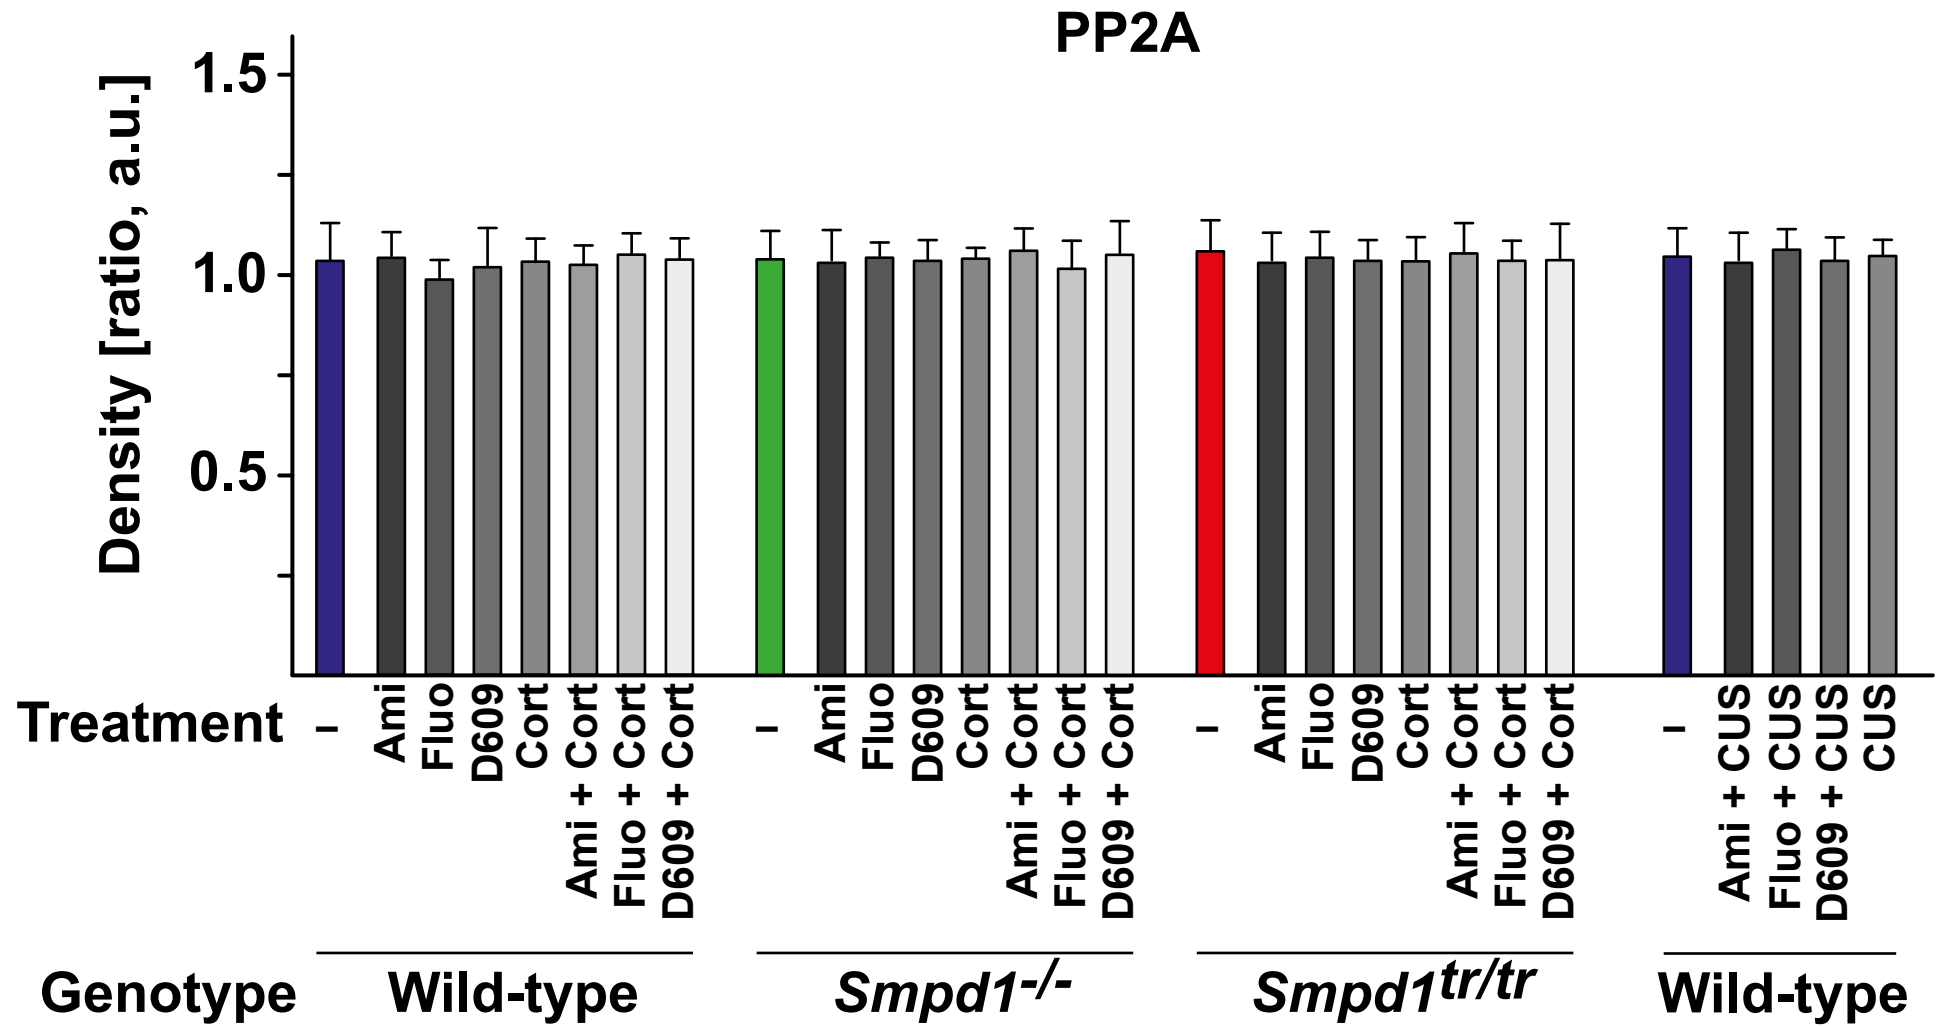

Supplementary Fig. 5b

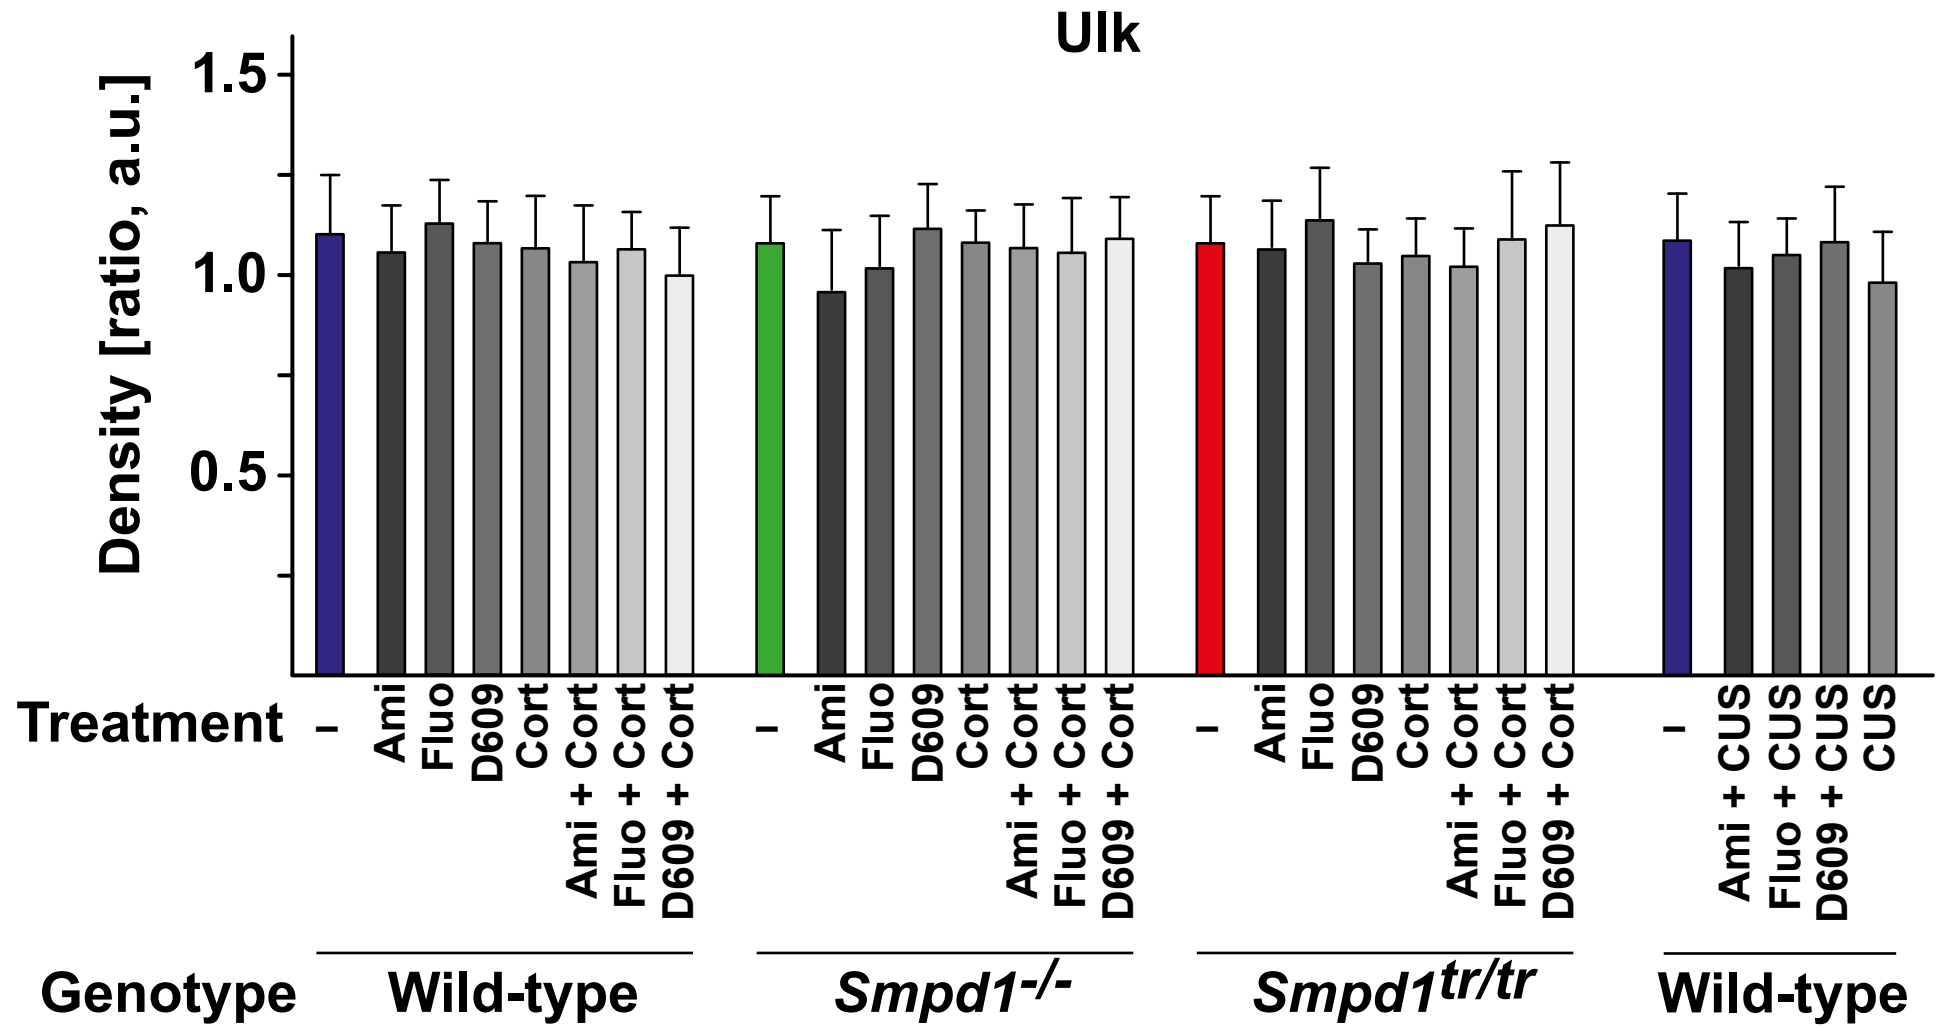

Supplementary Fig. 5c

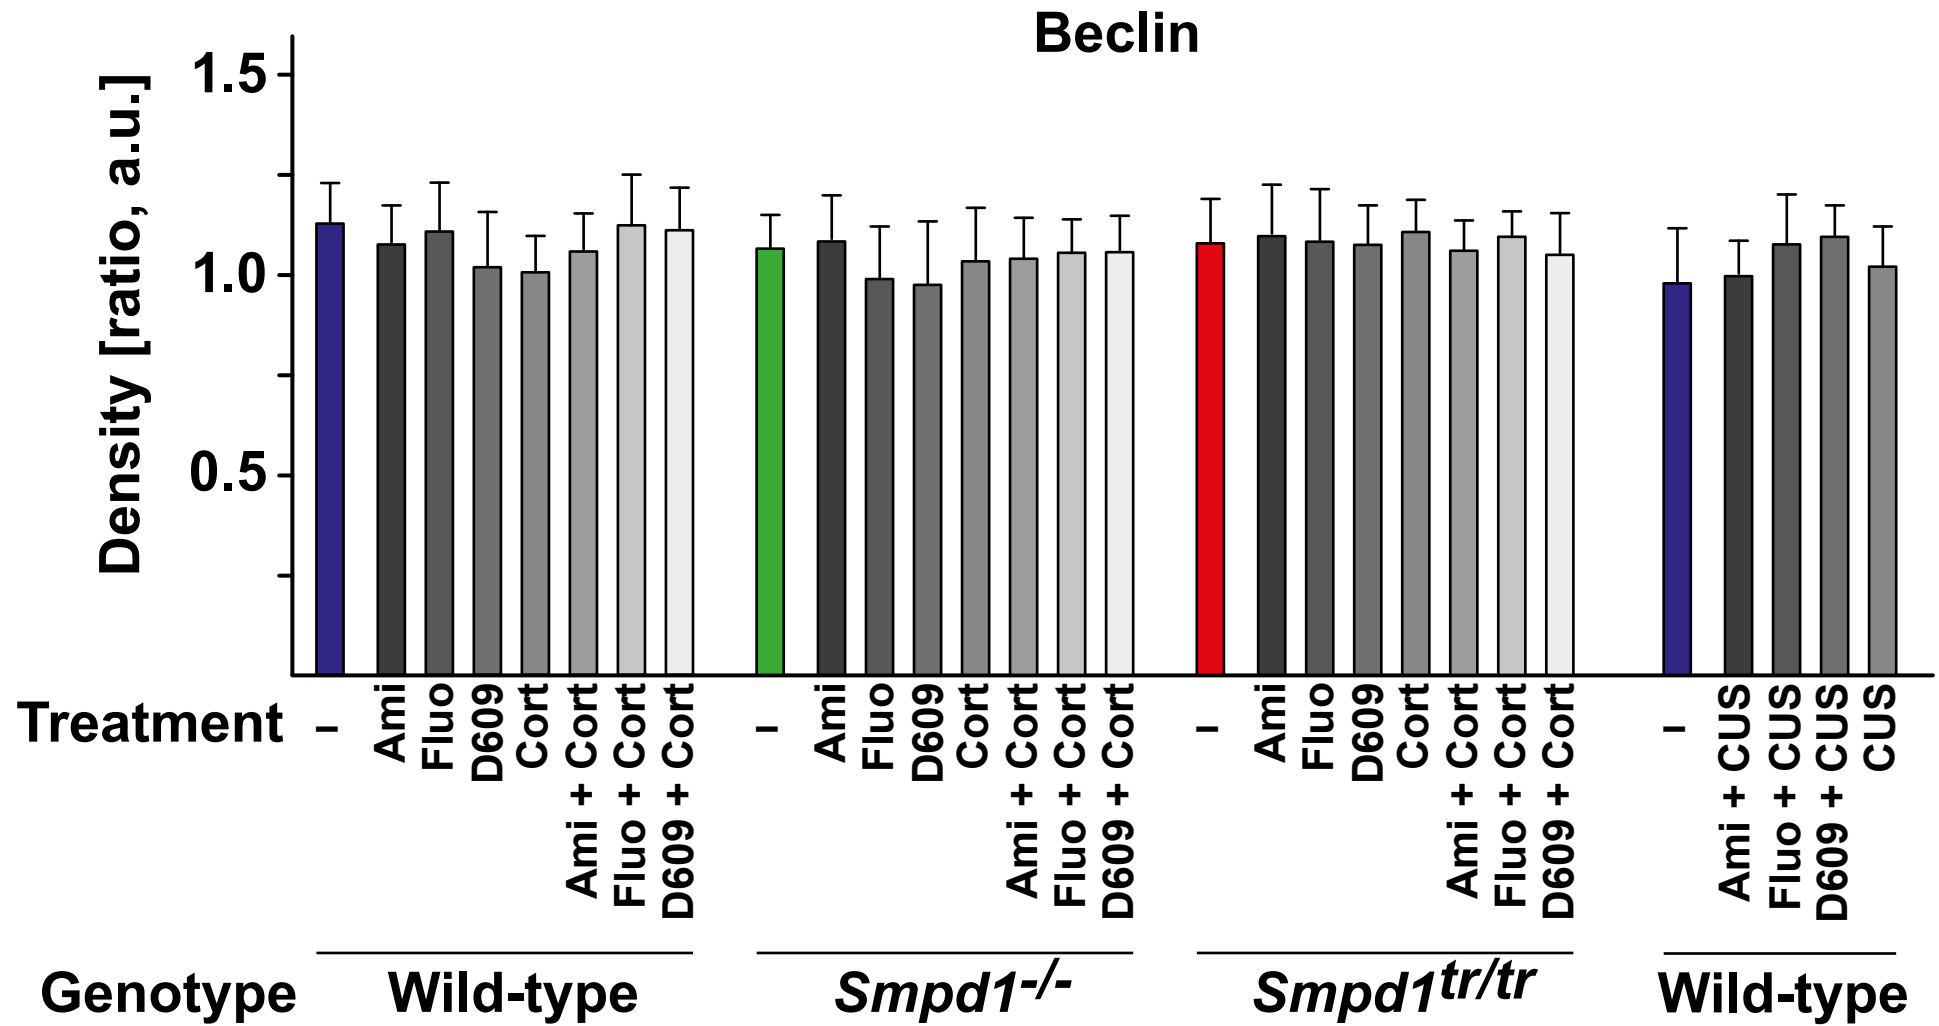

Supplementary Fig. 5d

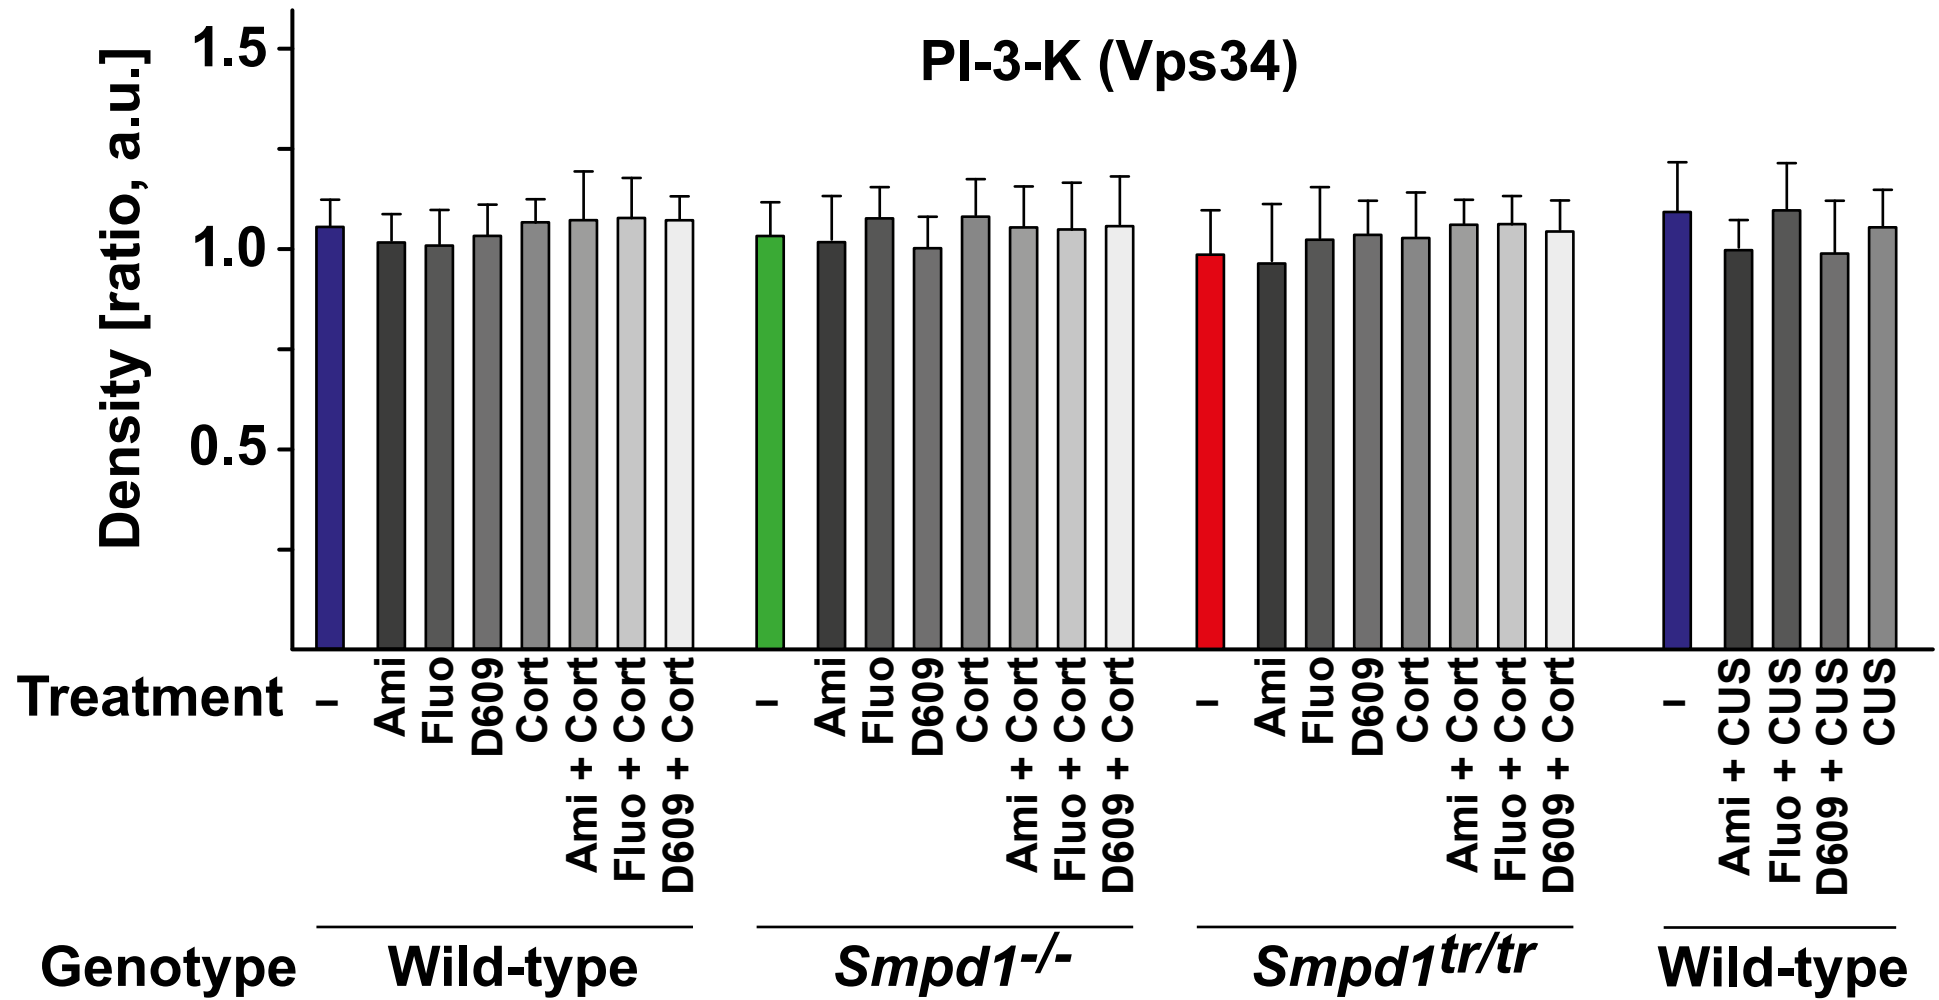



## p-Ulk-S757

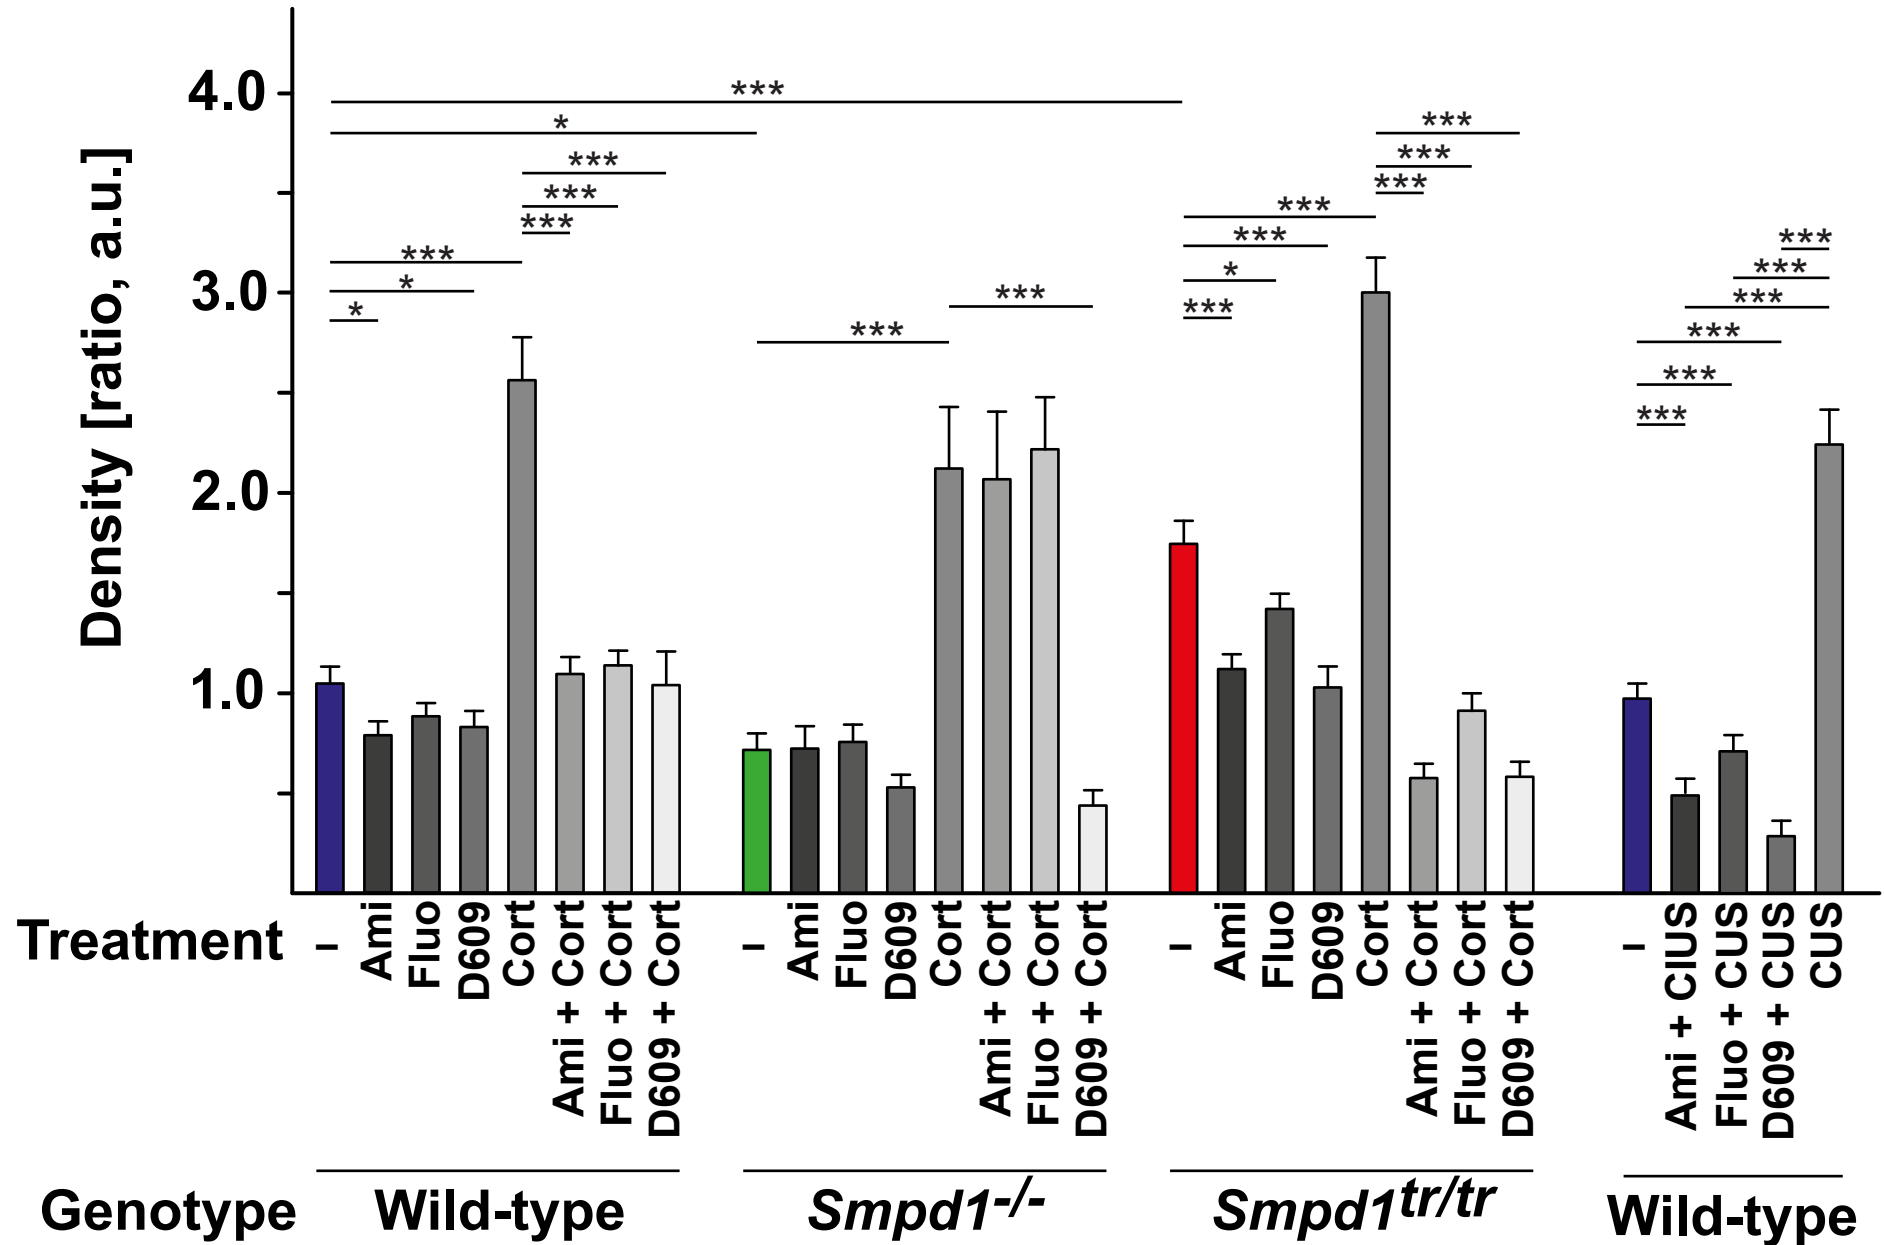

Supplementary Fig. 6b

p-Ulk-S555

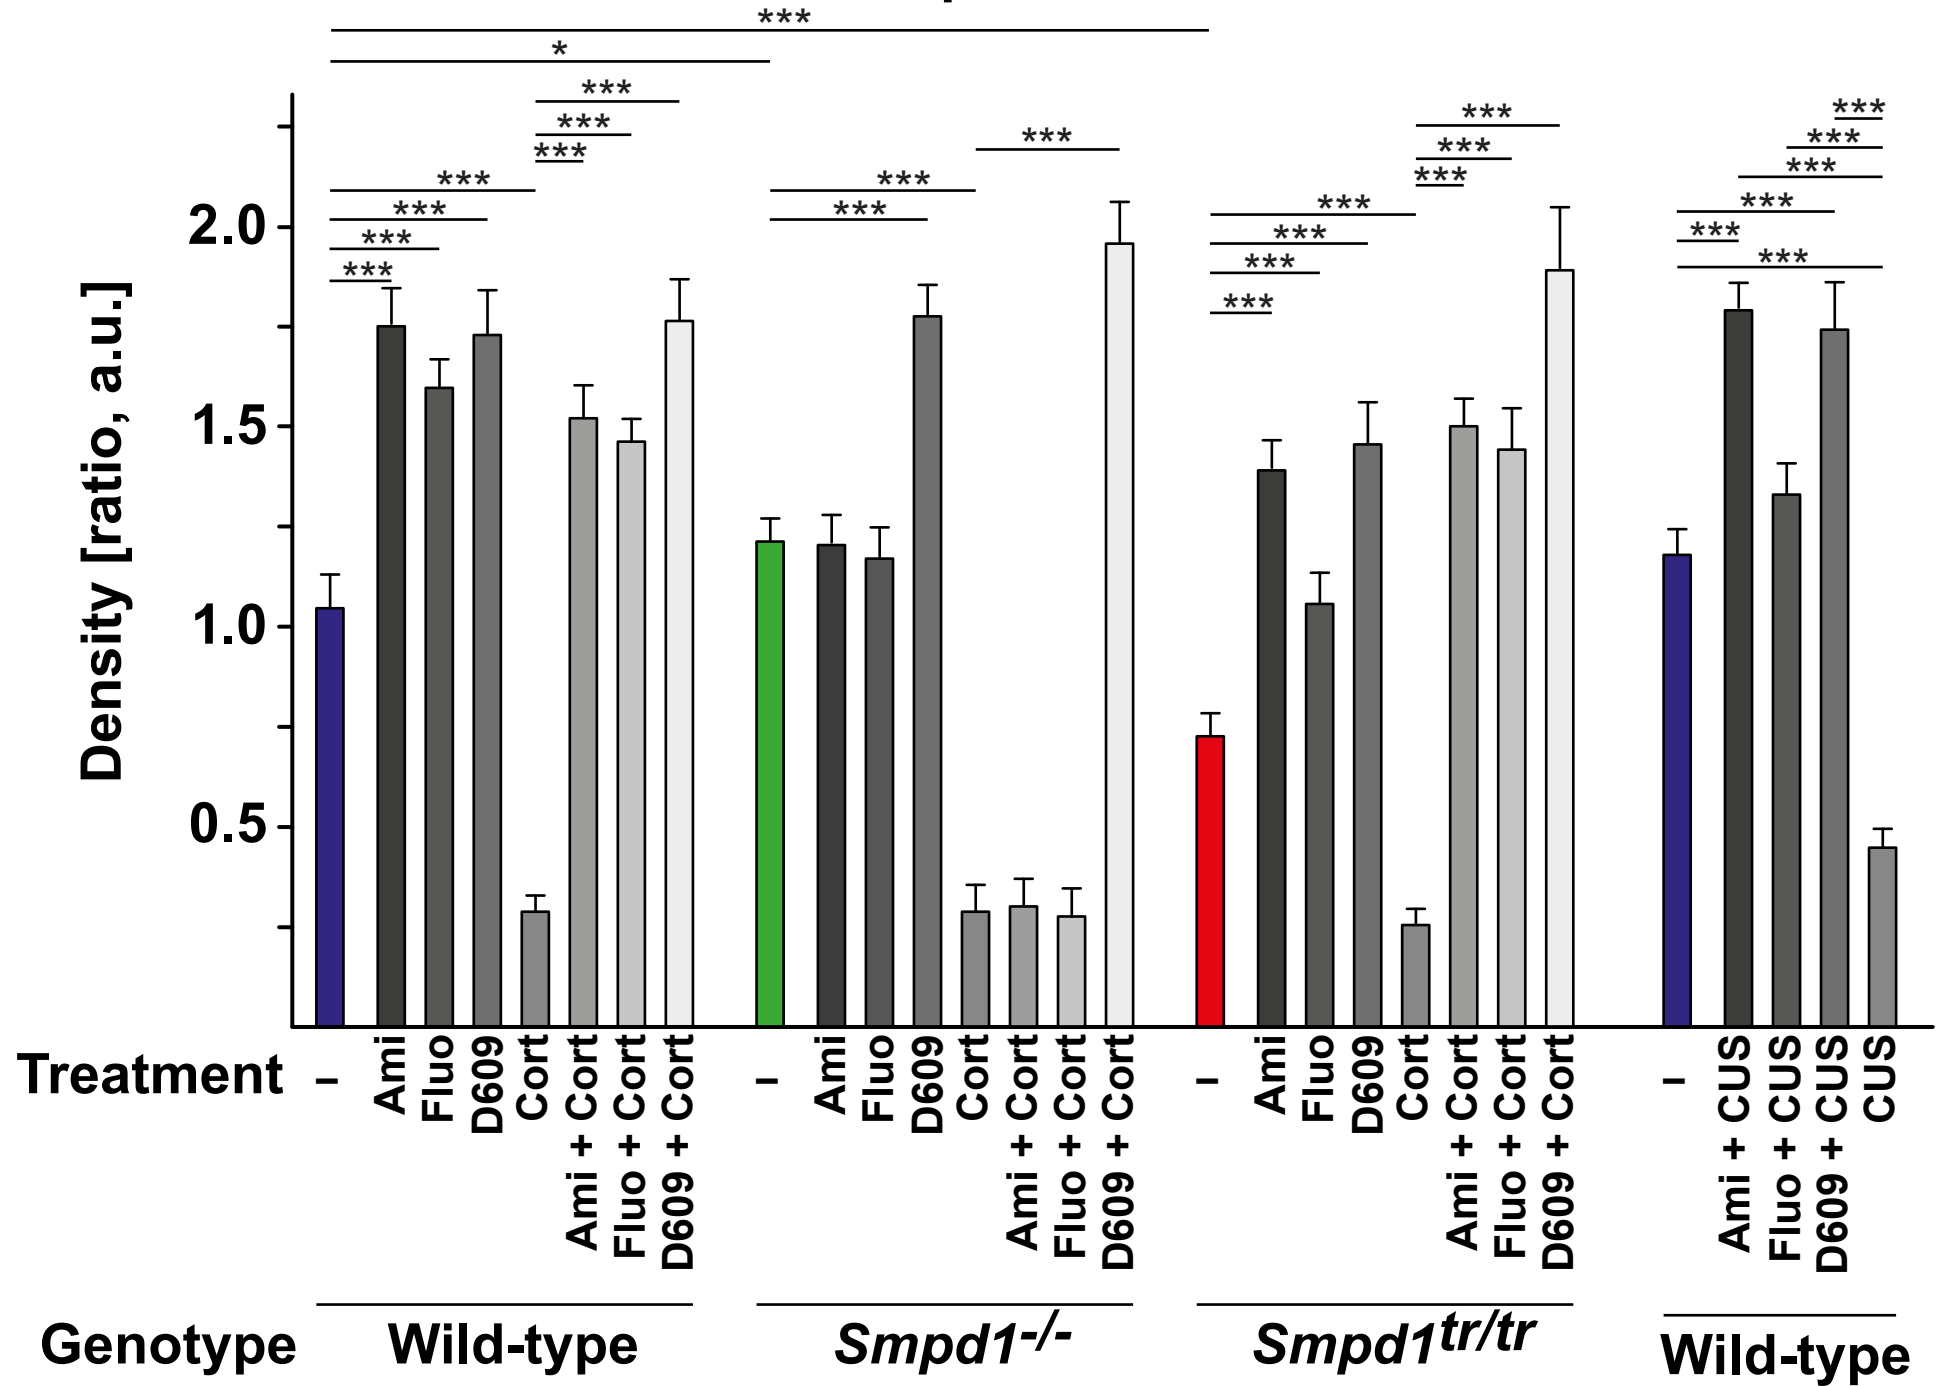

Supplementary Fig. 6c

p-Beclin

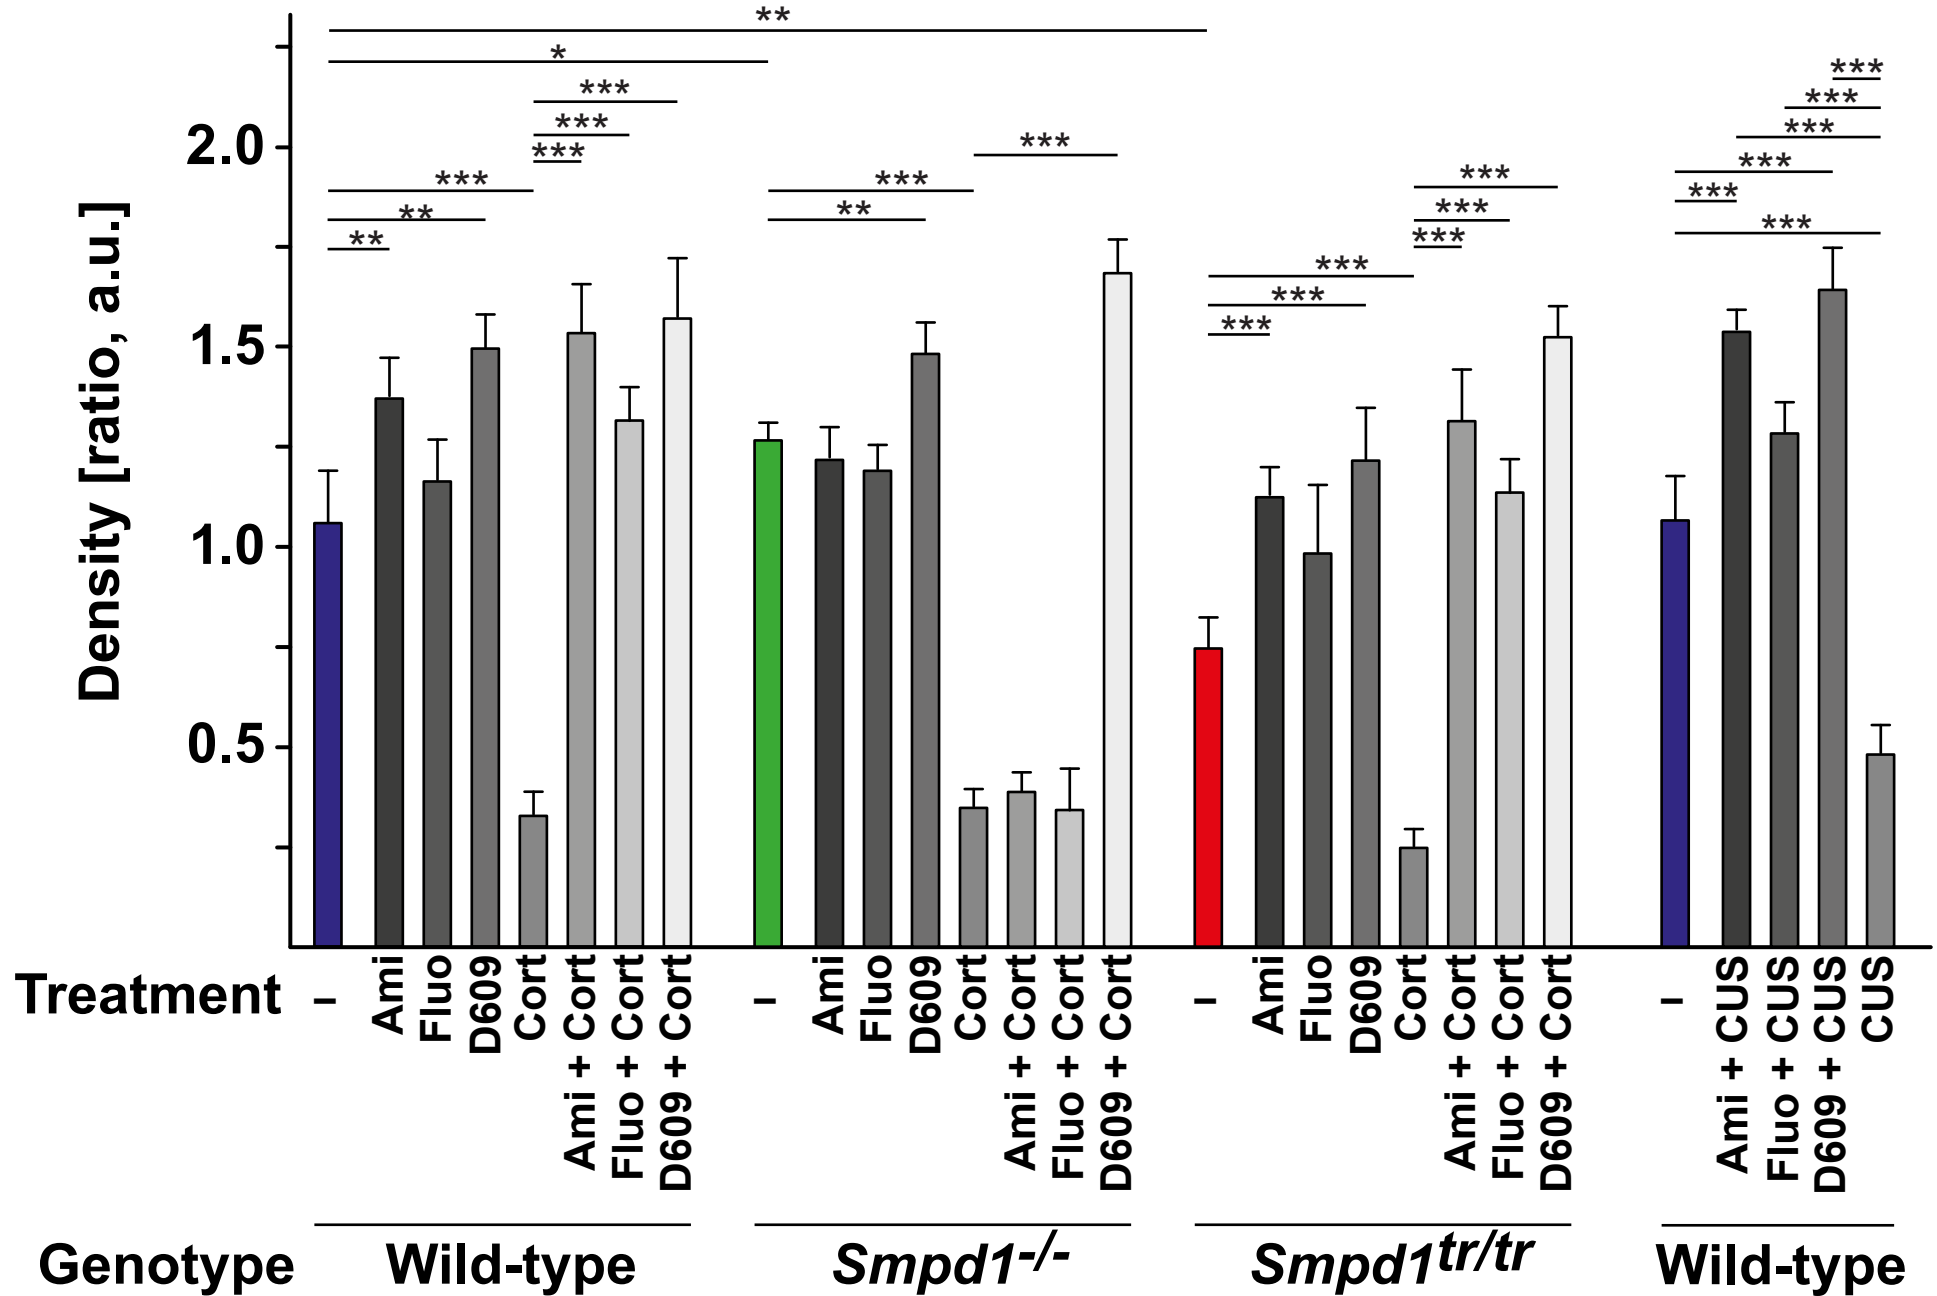

Supplementary Fig. 6d

p-PI-3-K (Vps34)

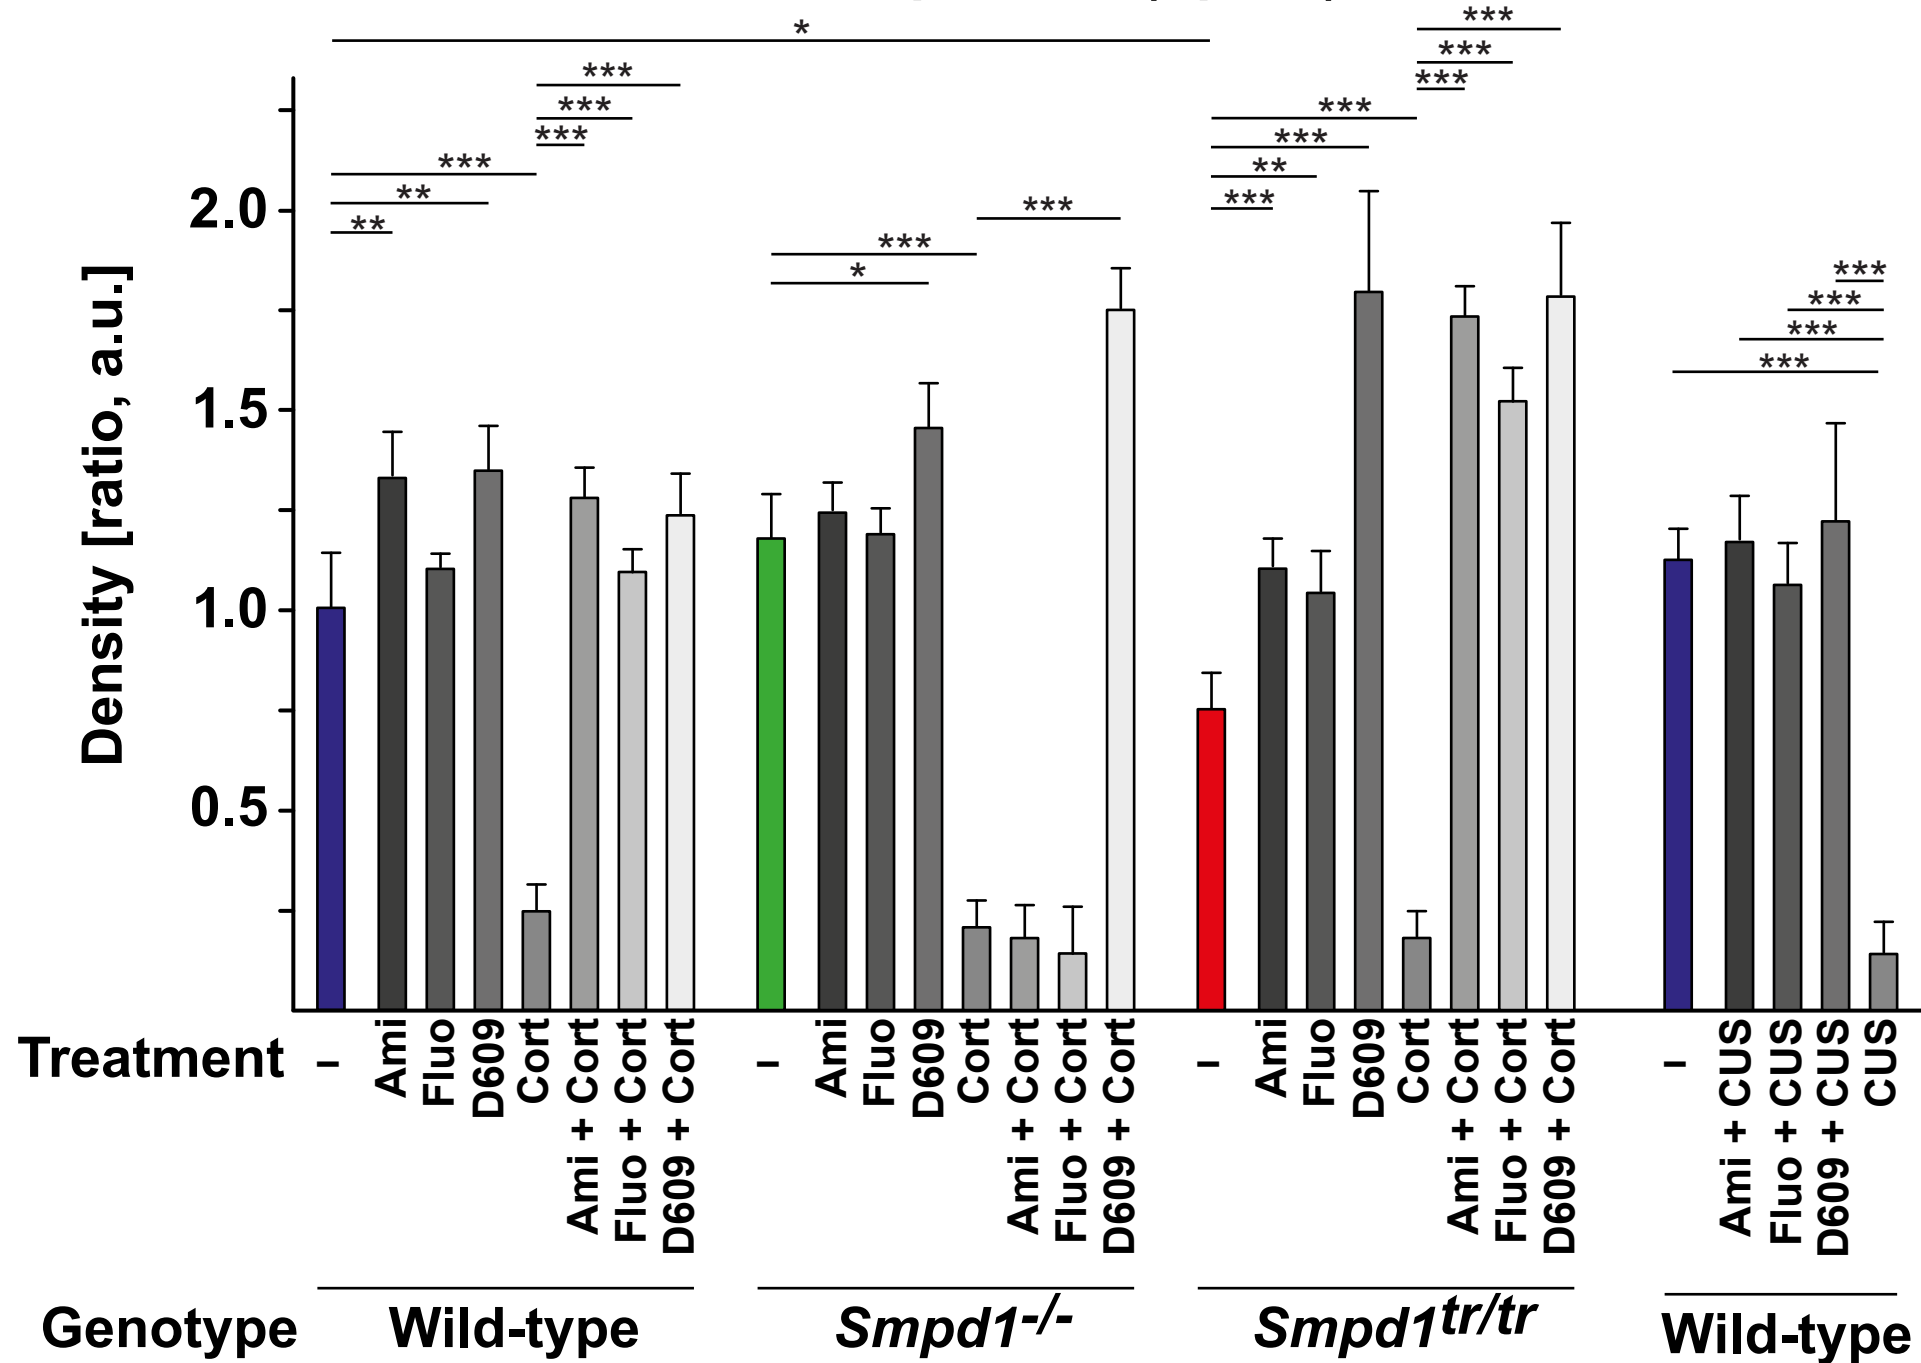

Supplementary Fig. 6e

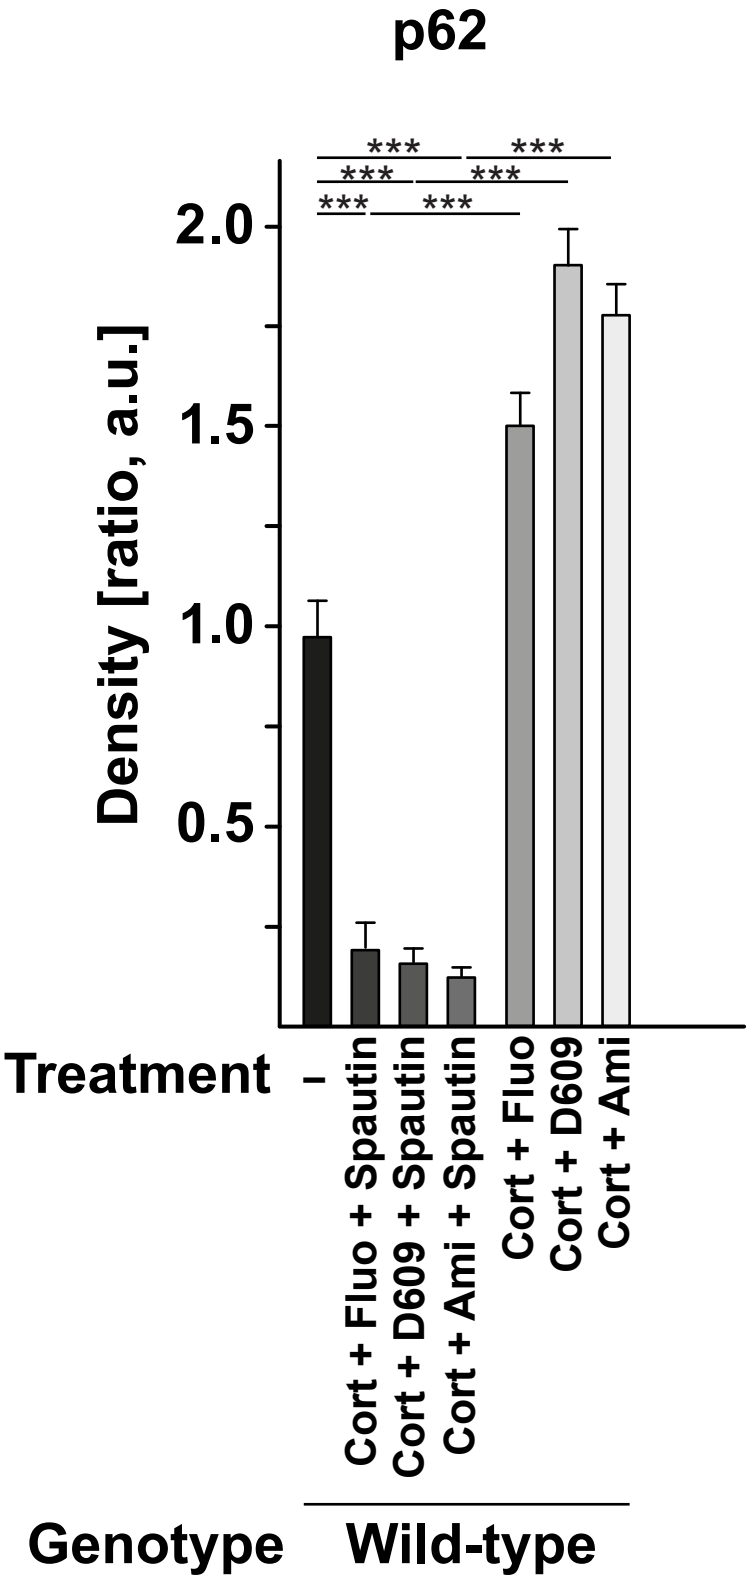

Supplementary Fig. 6f

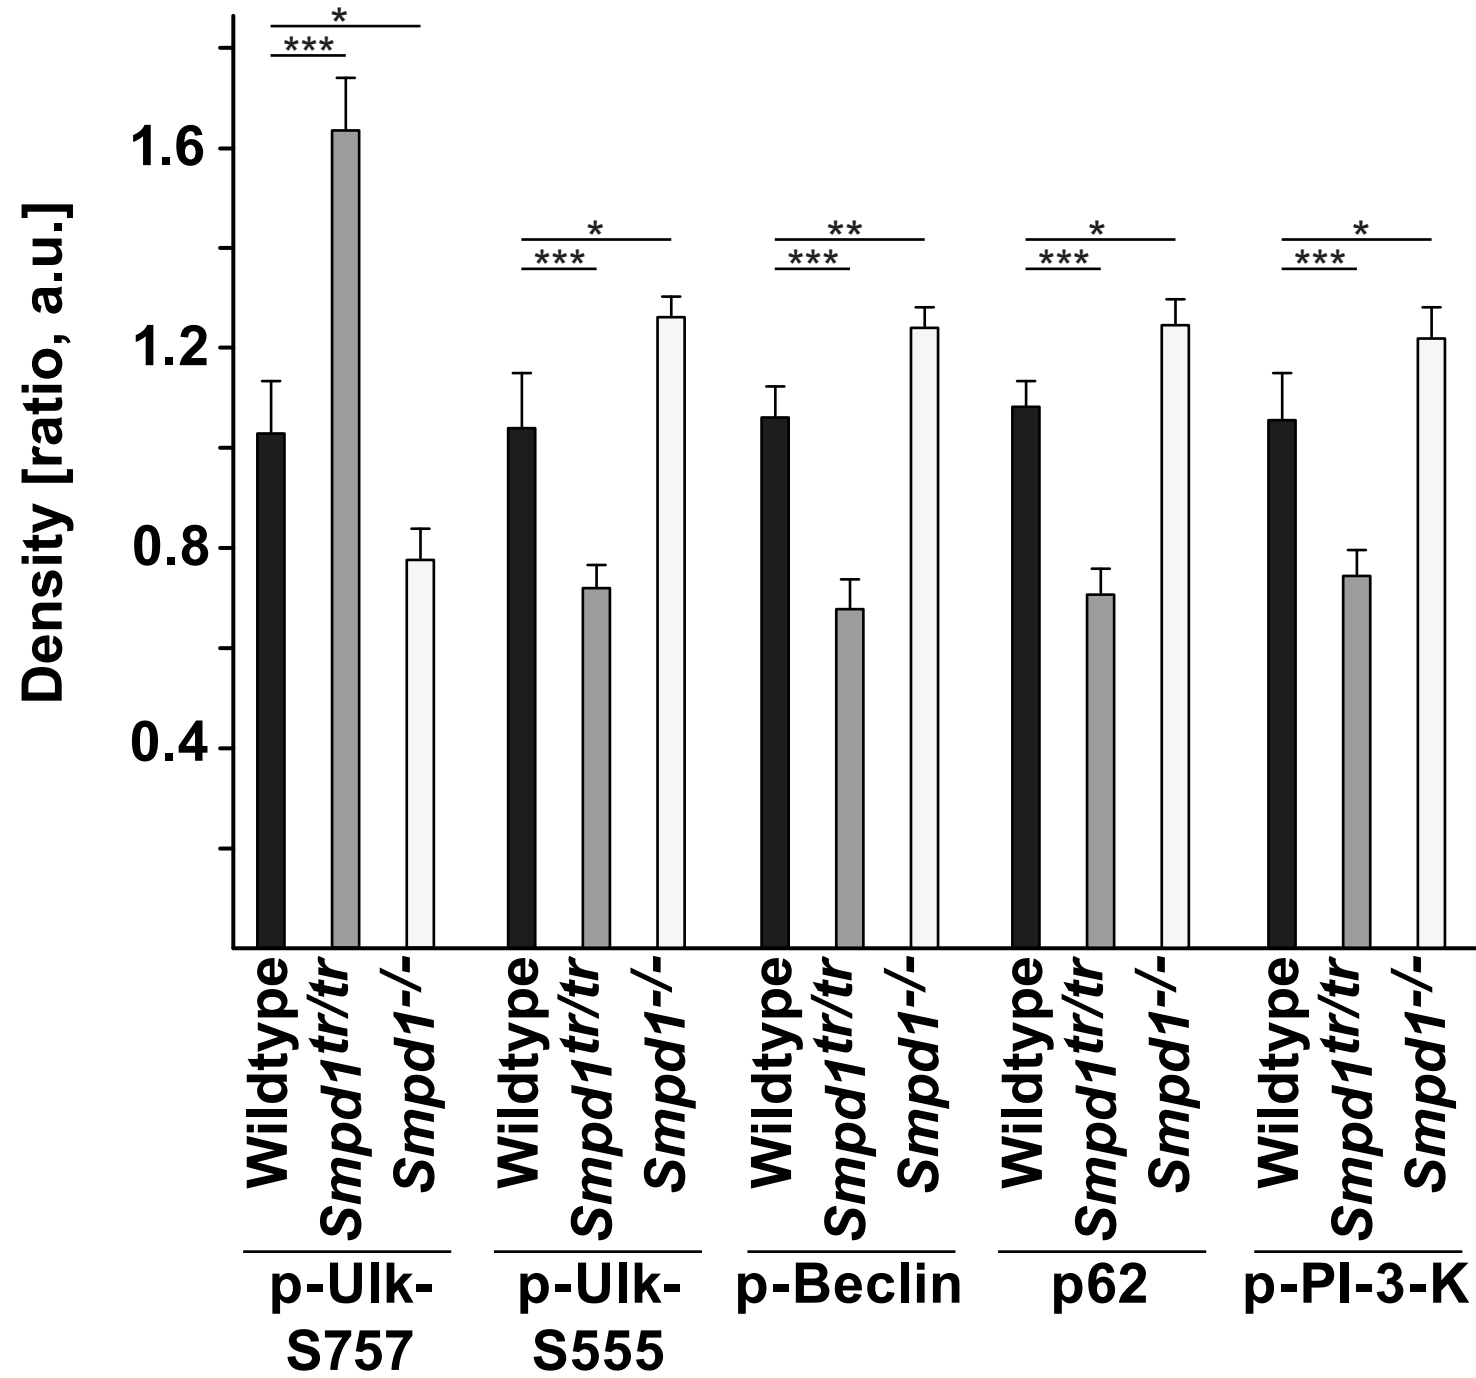

Supplementary Fig. 7

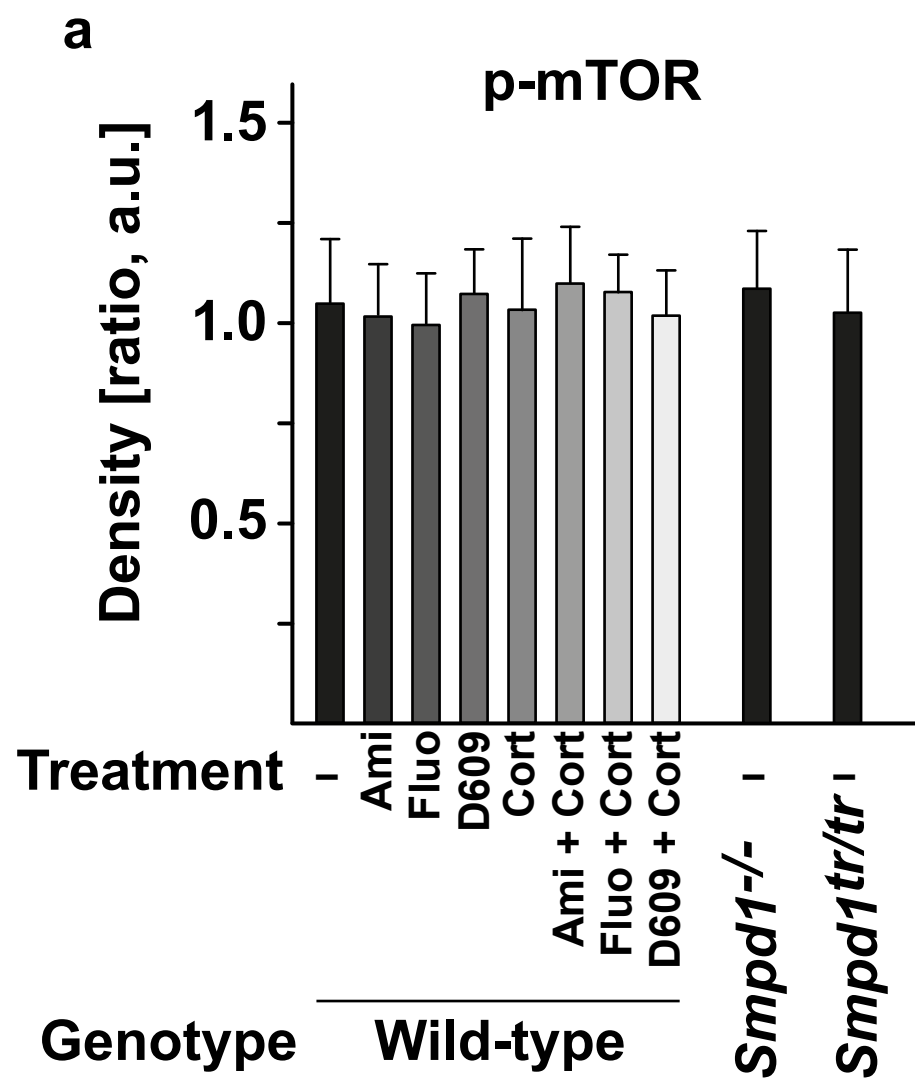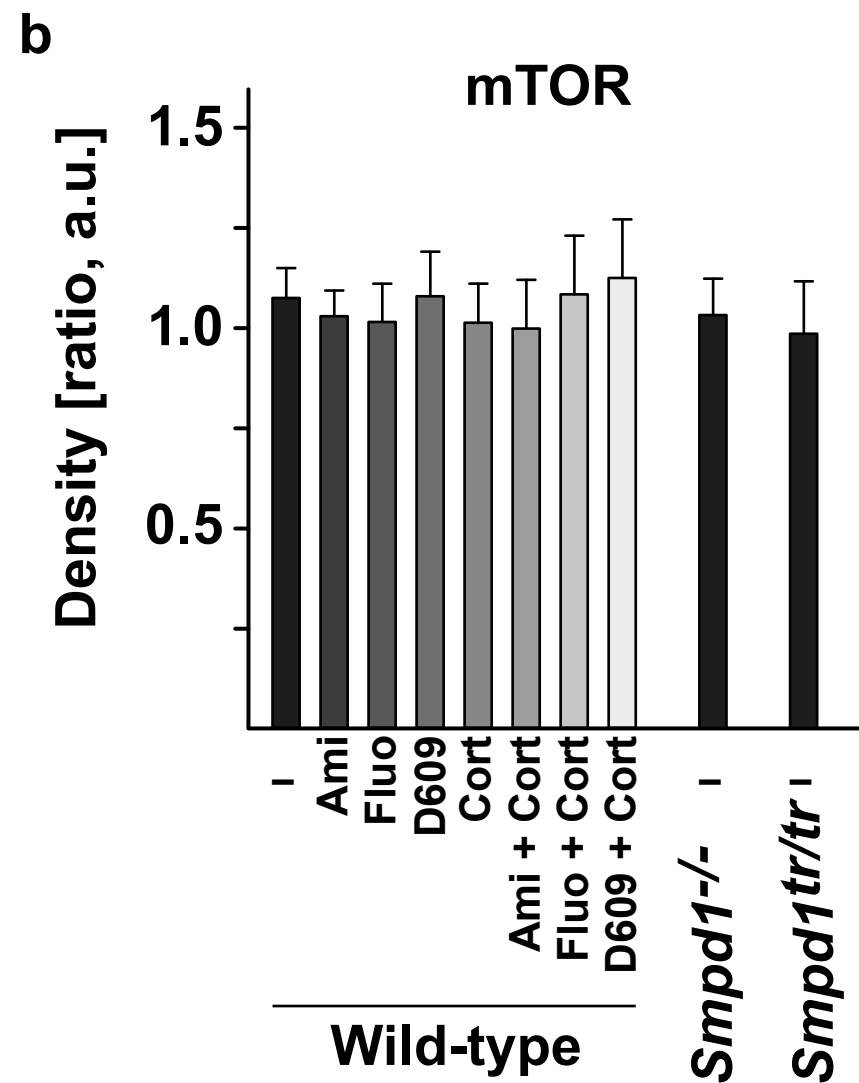

Supplementary Fig. 8a

p-Ulk 757 (fluorescence)

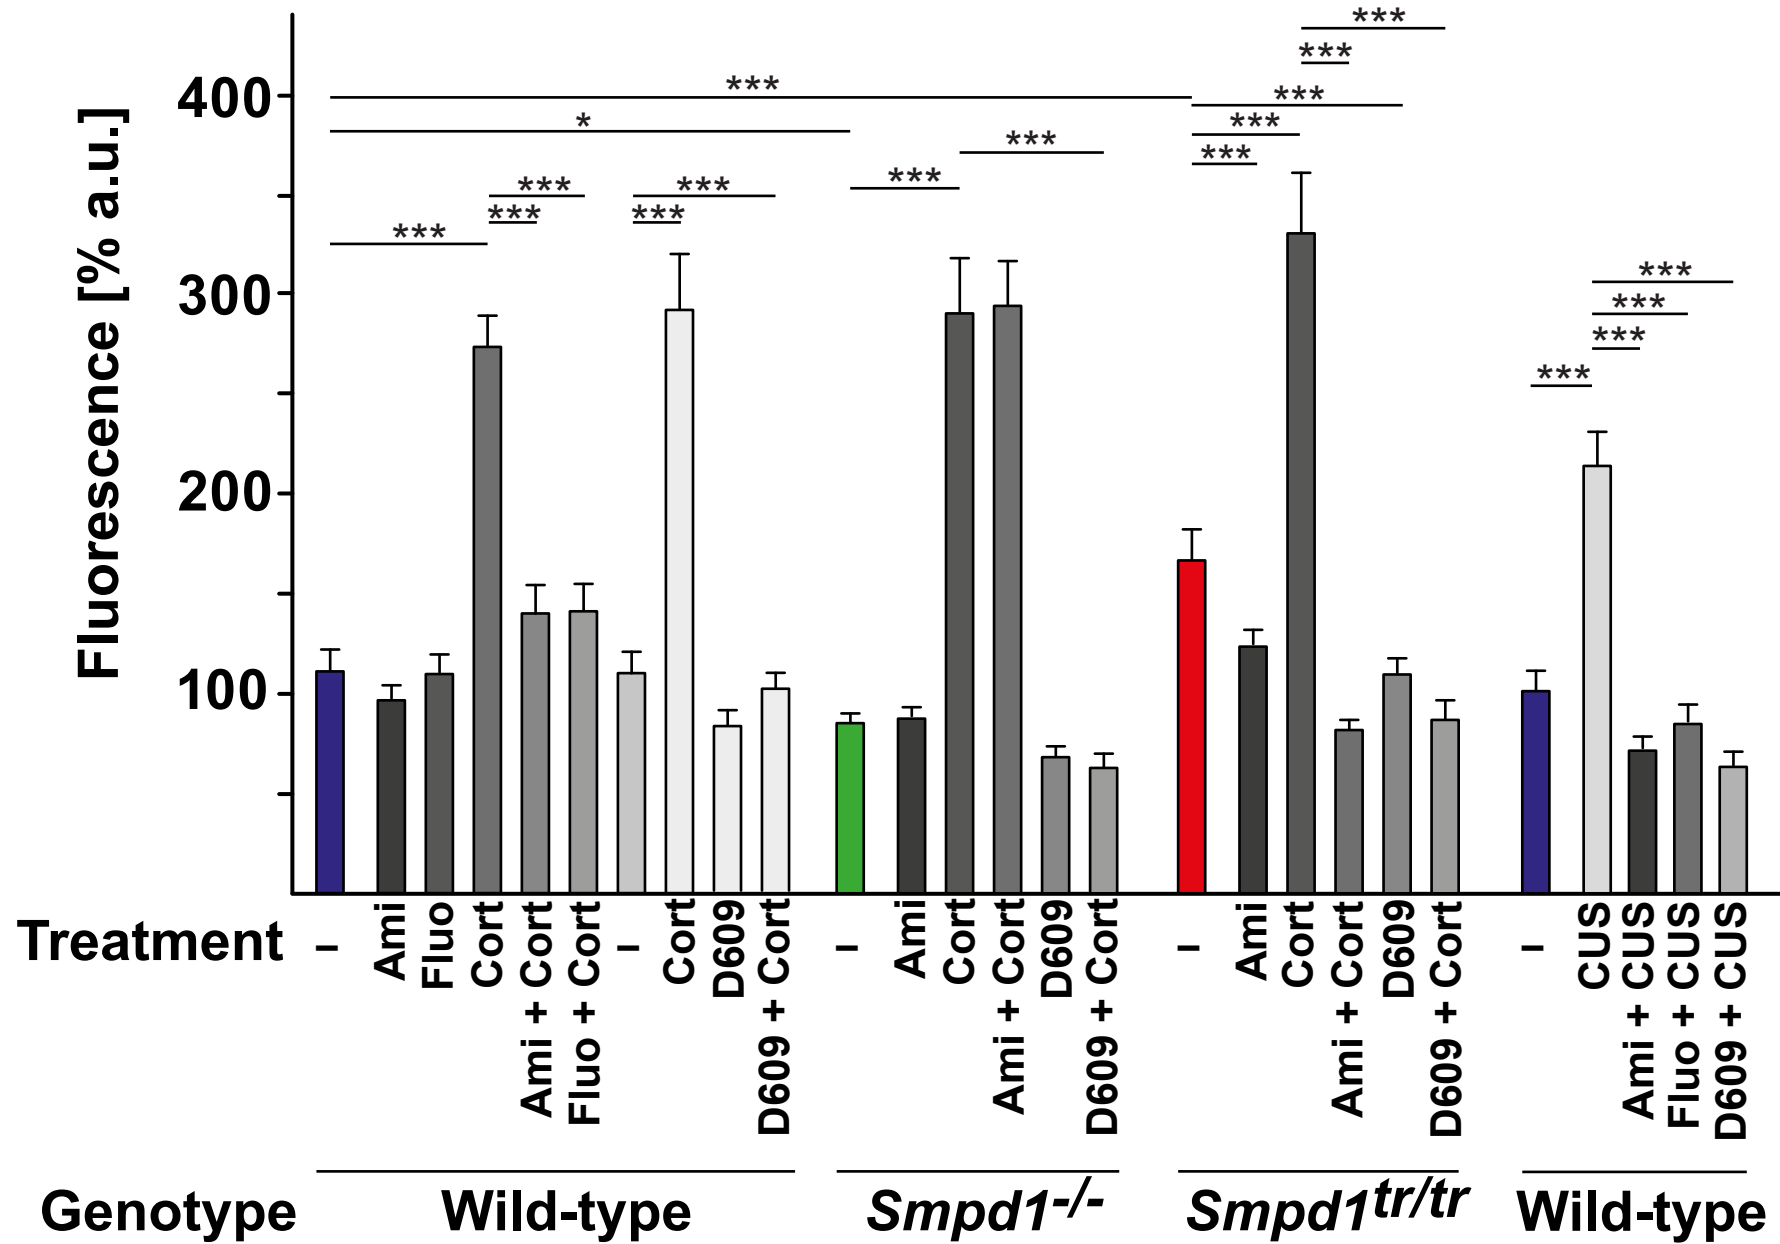



Supplementary Fig. 8b

## p-Beclin (fluorescence)

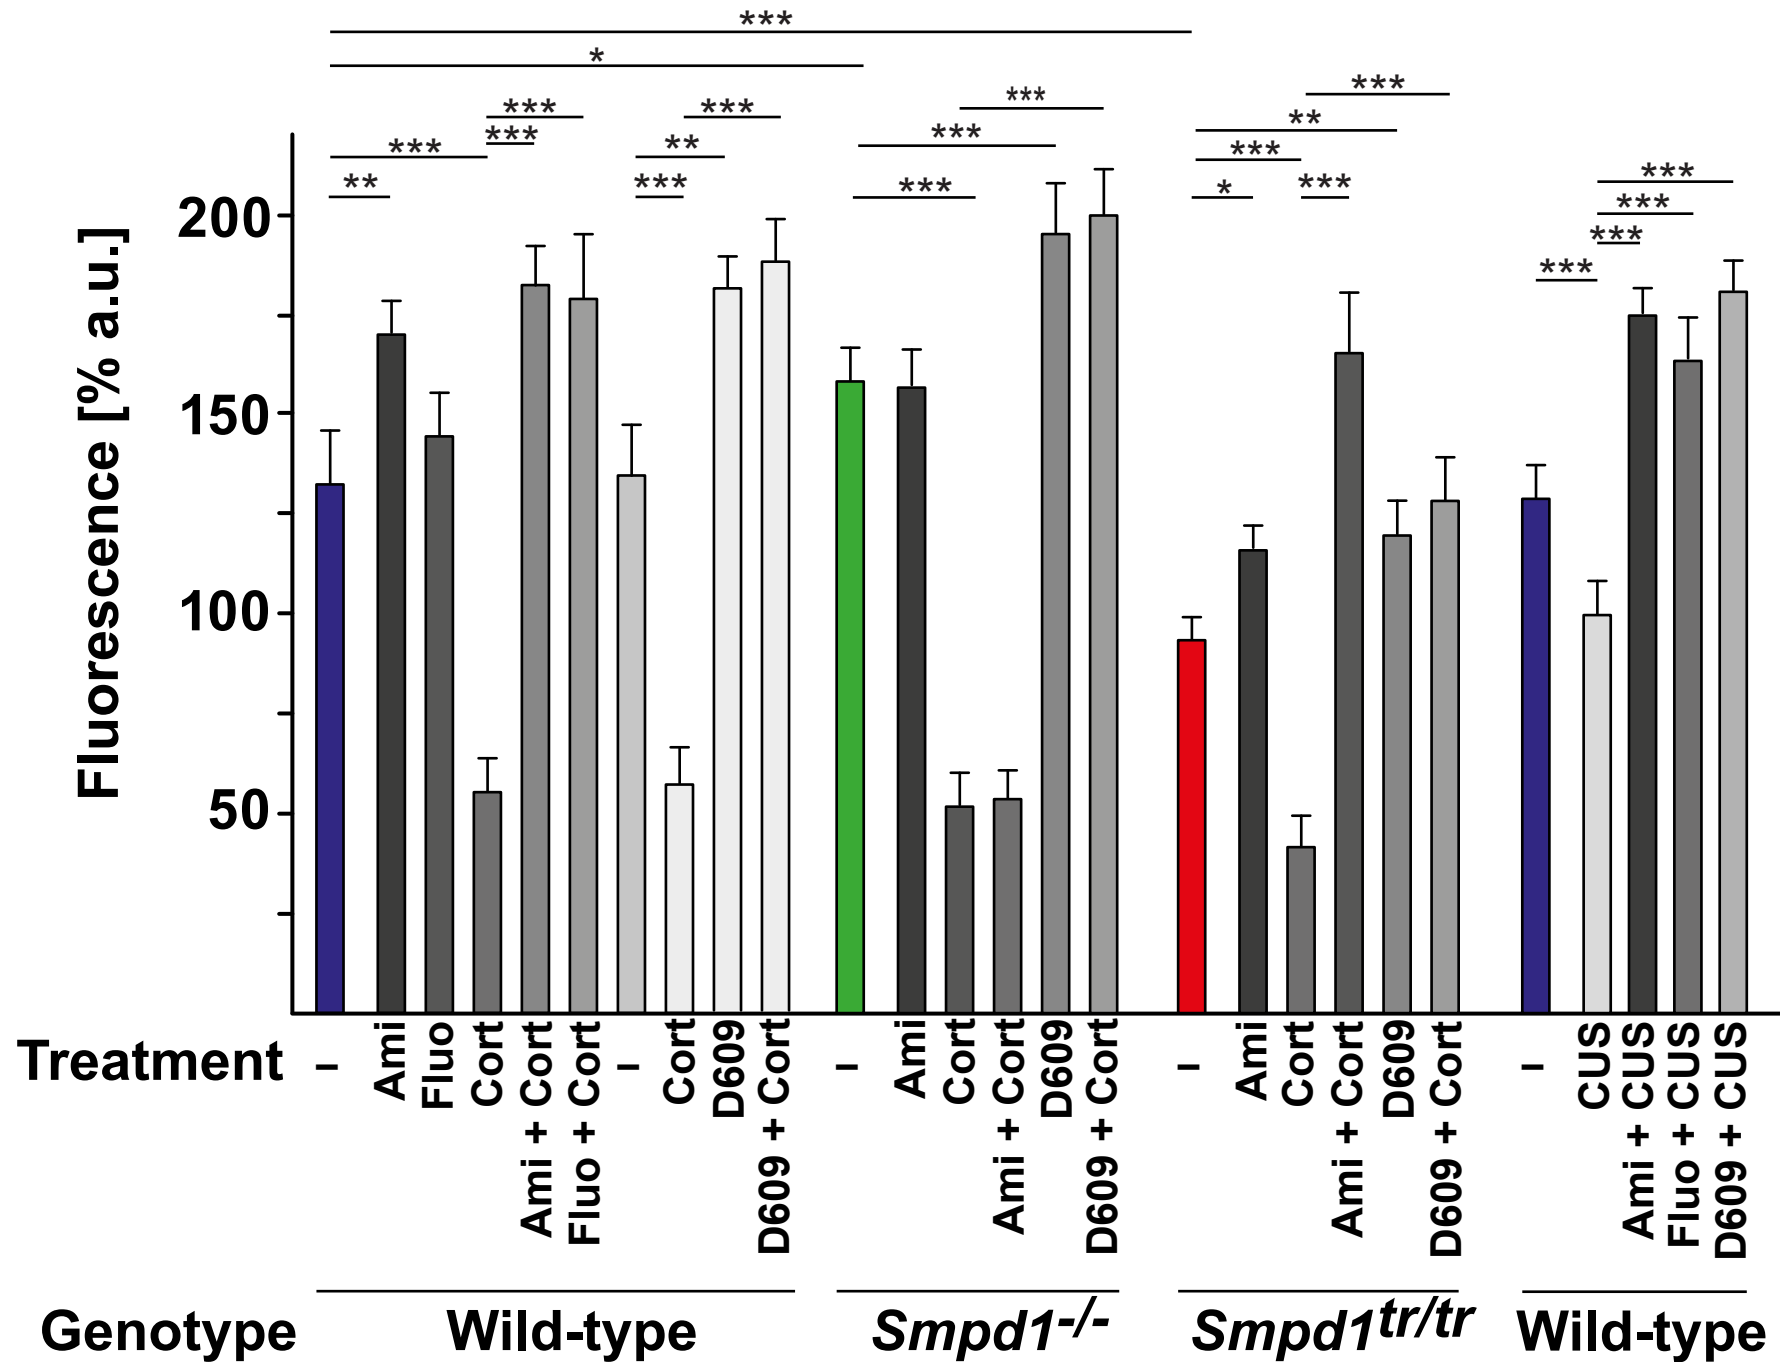

Supplementary Fig. 8c

p62 (fluorescence)

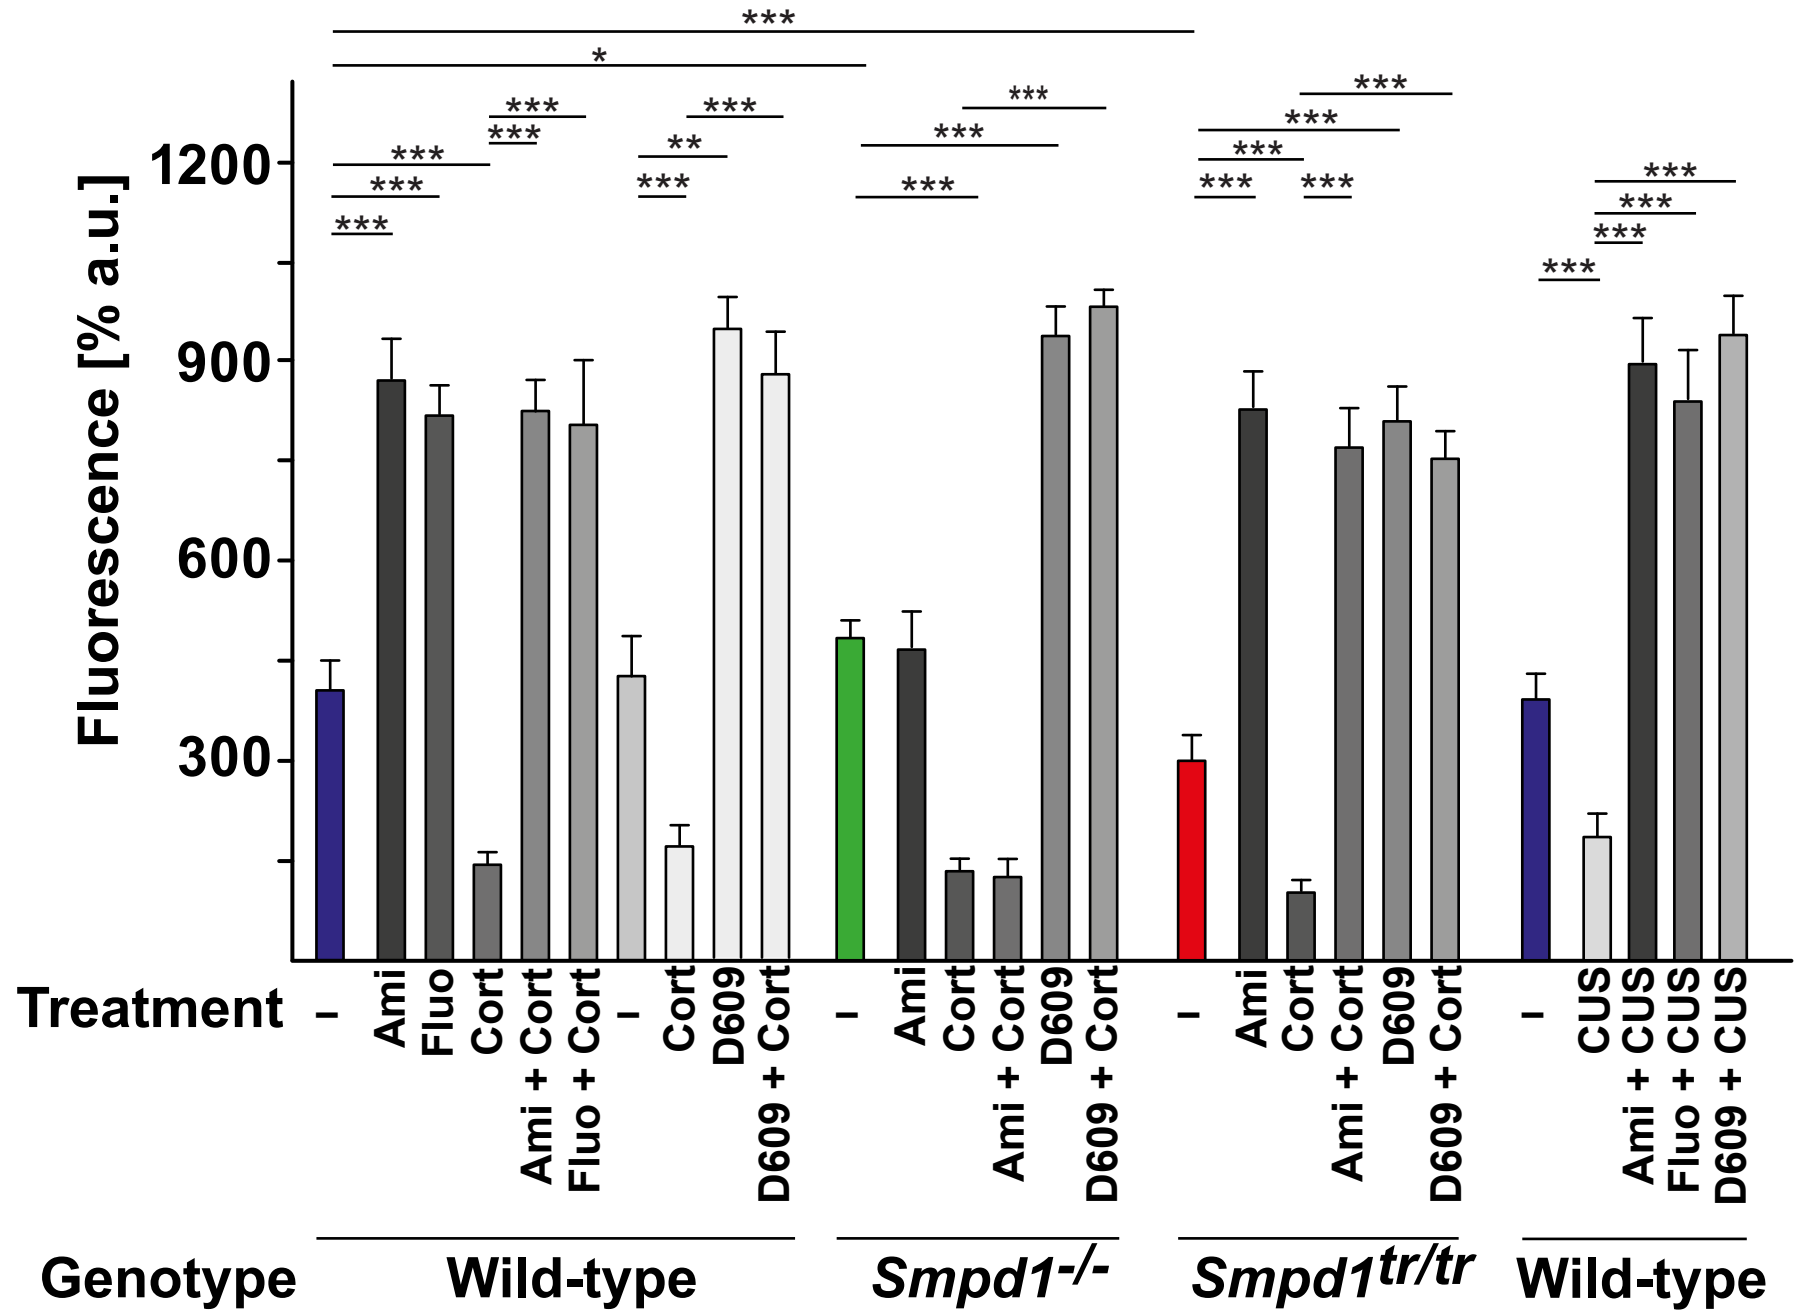

Supplementary Fig. 8d

Cy3-coupled secondary antibody/unspecific control staining

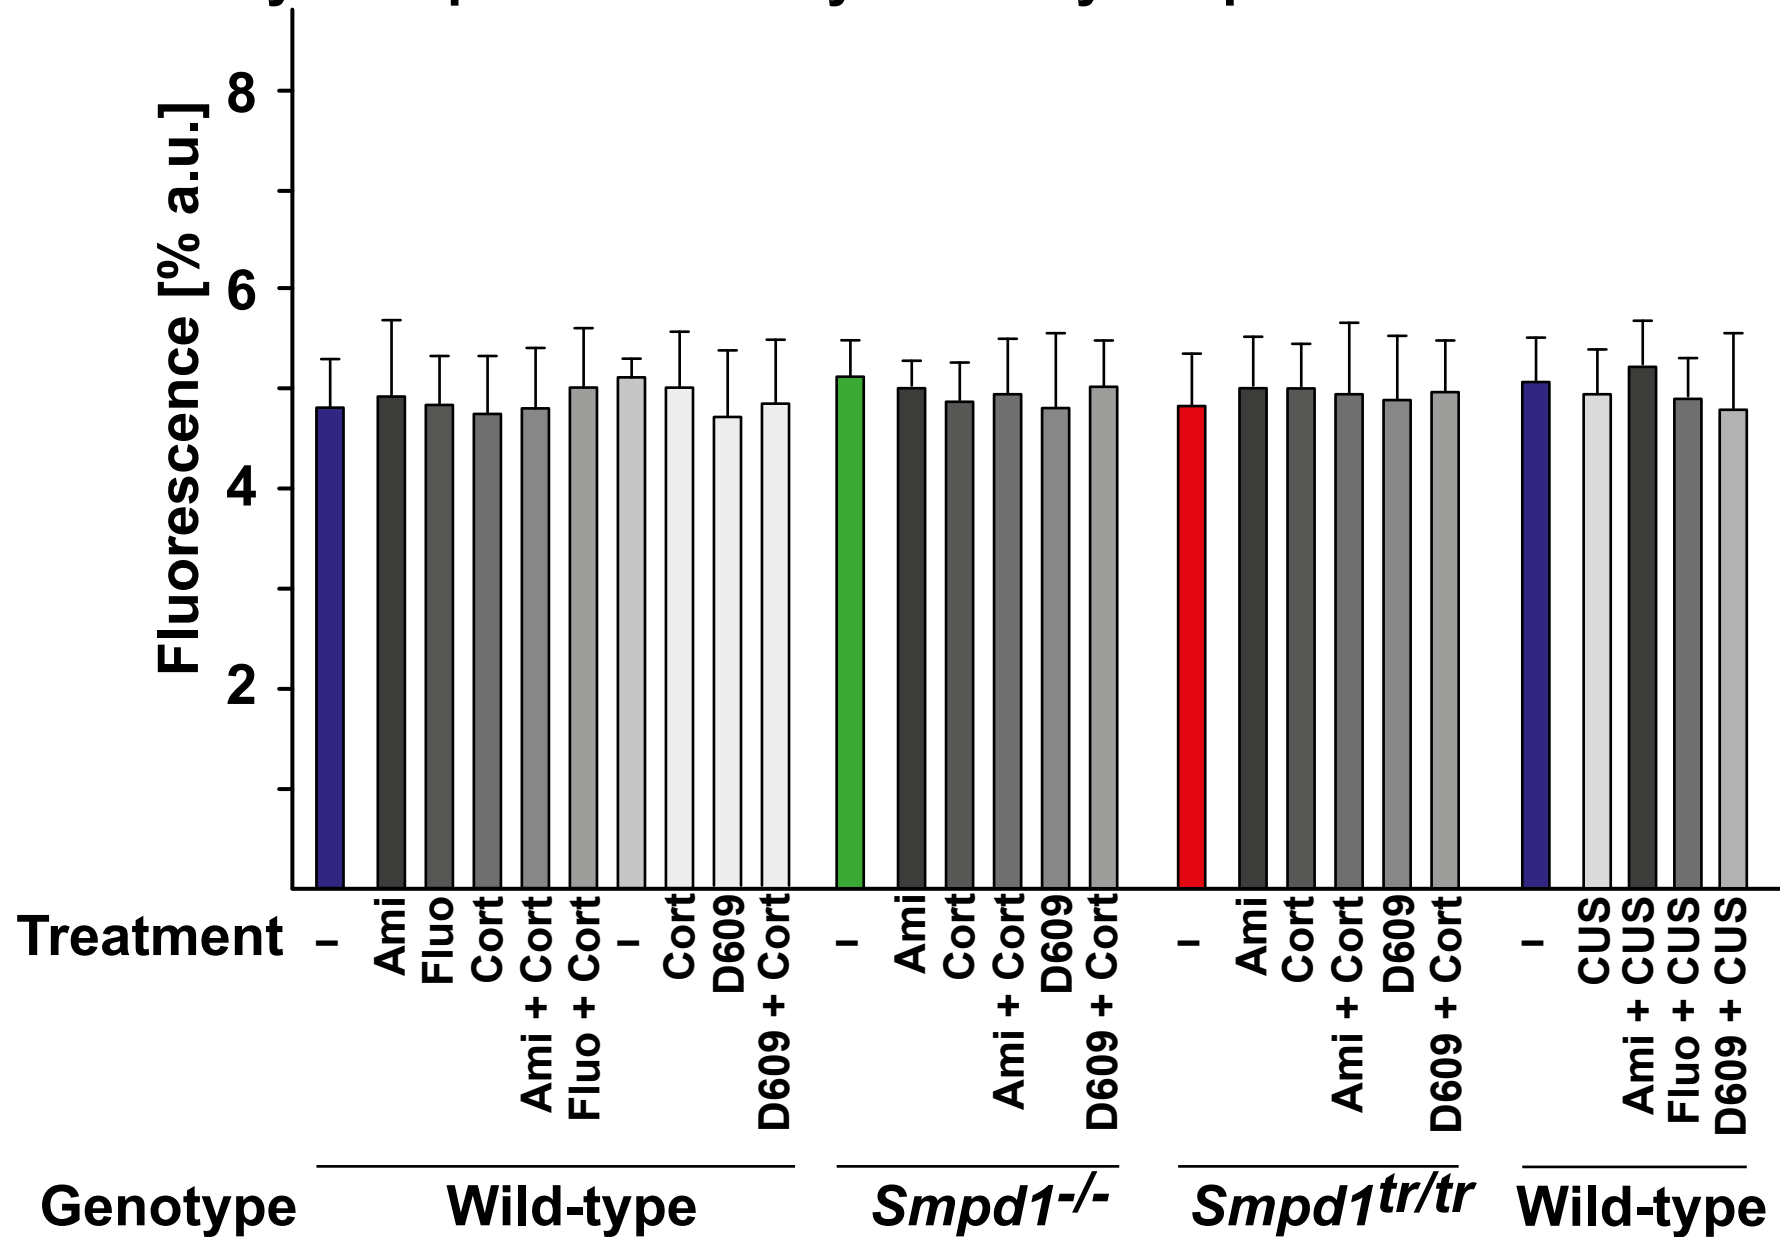

Supplementary Fig. 9

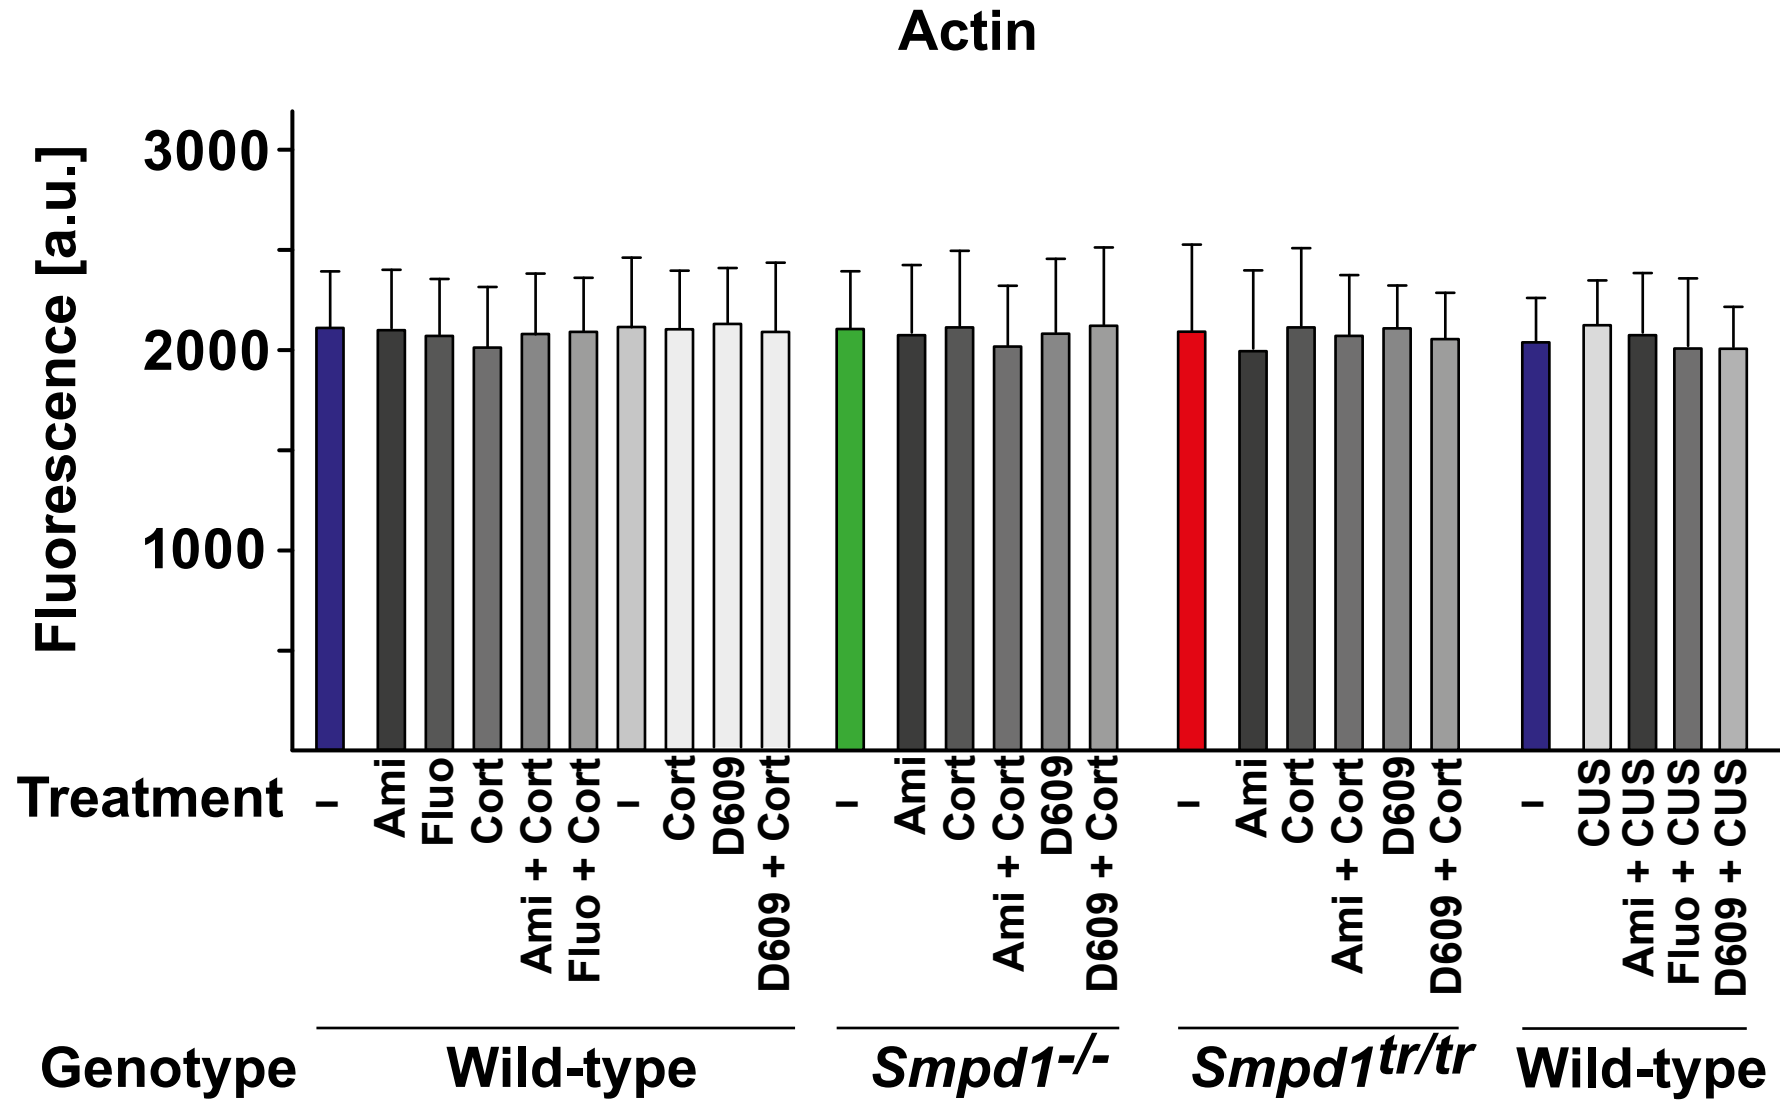

Supplementary Fig. 10a

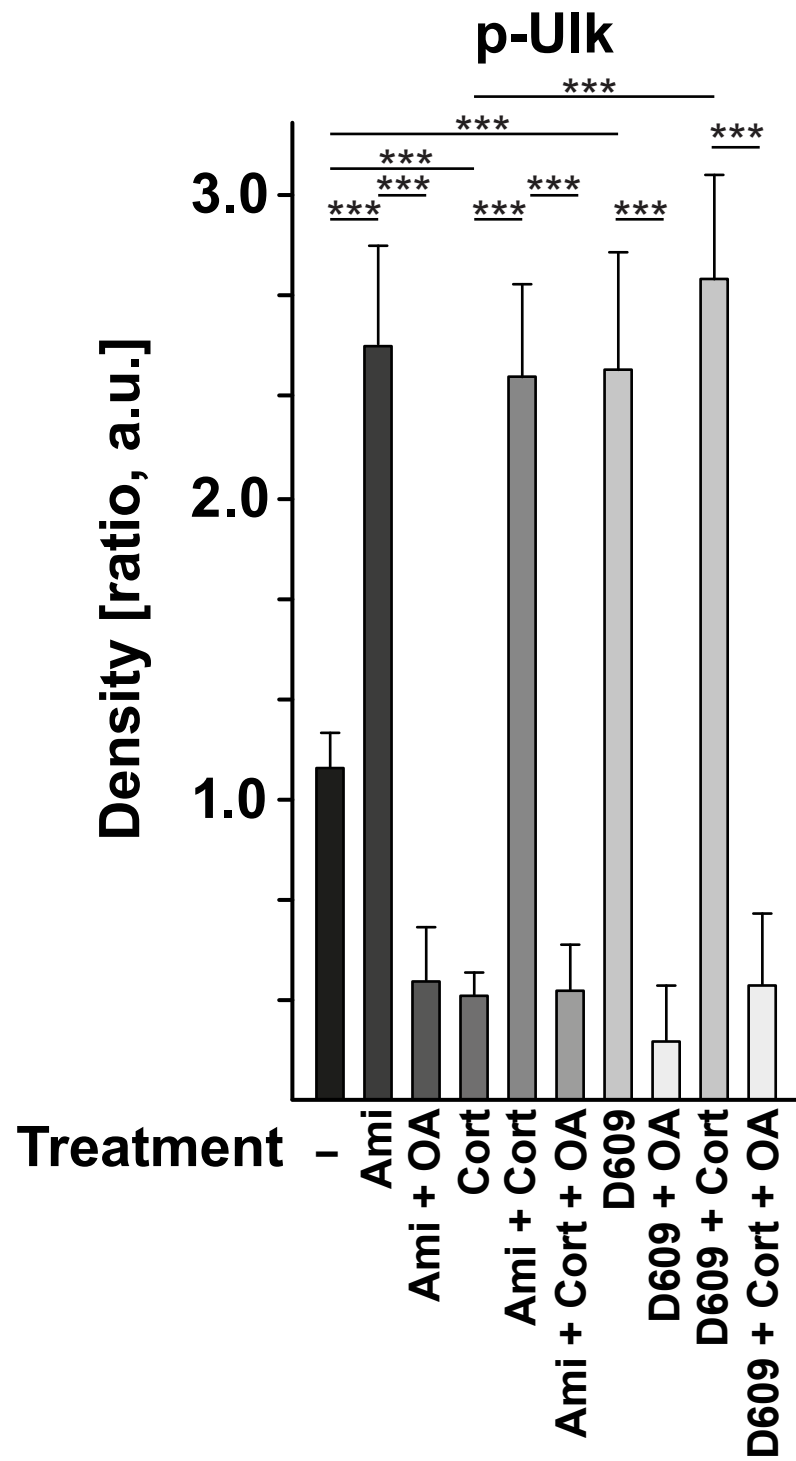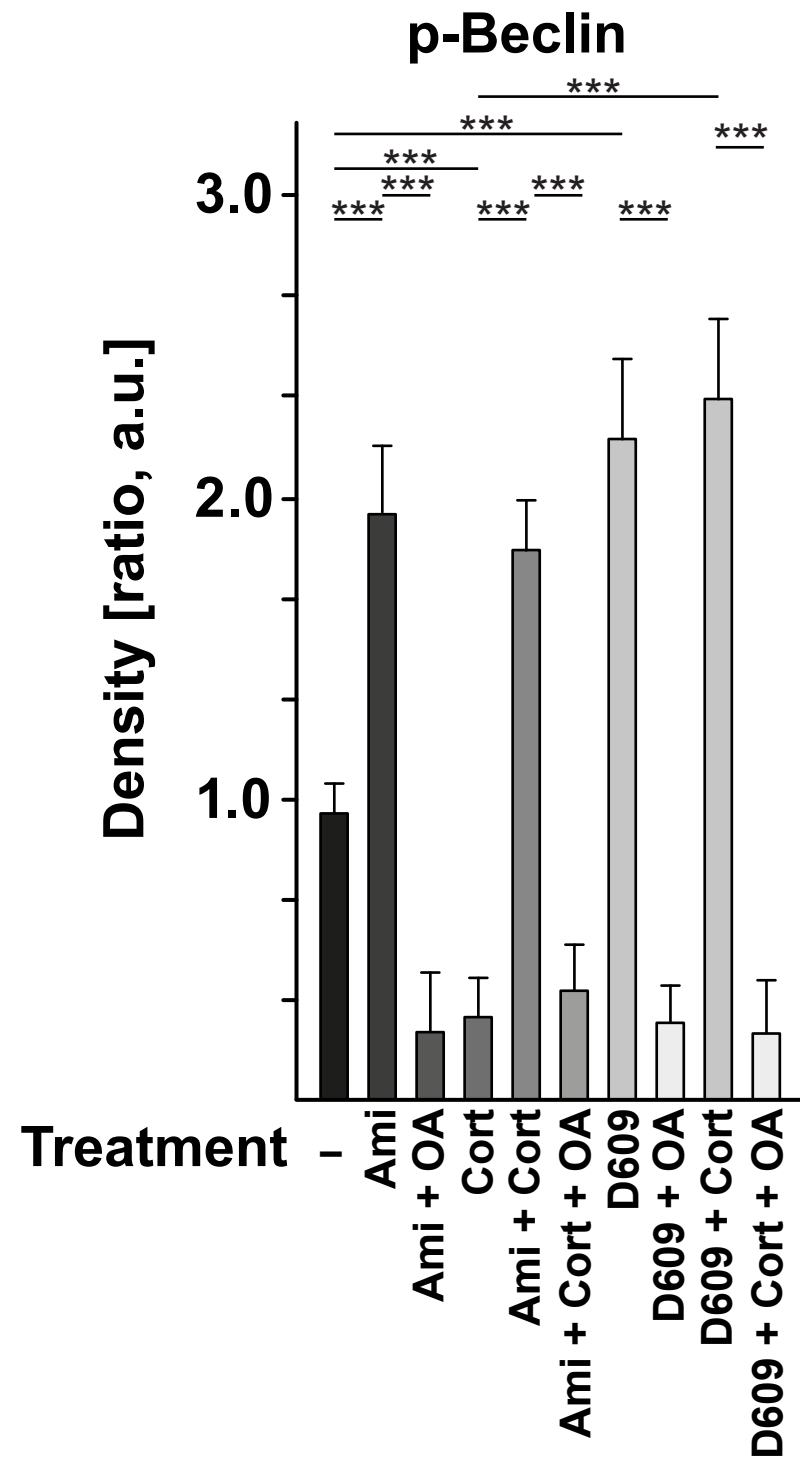

Supplementary Fig. 10b

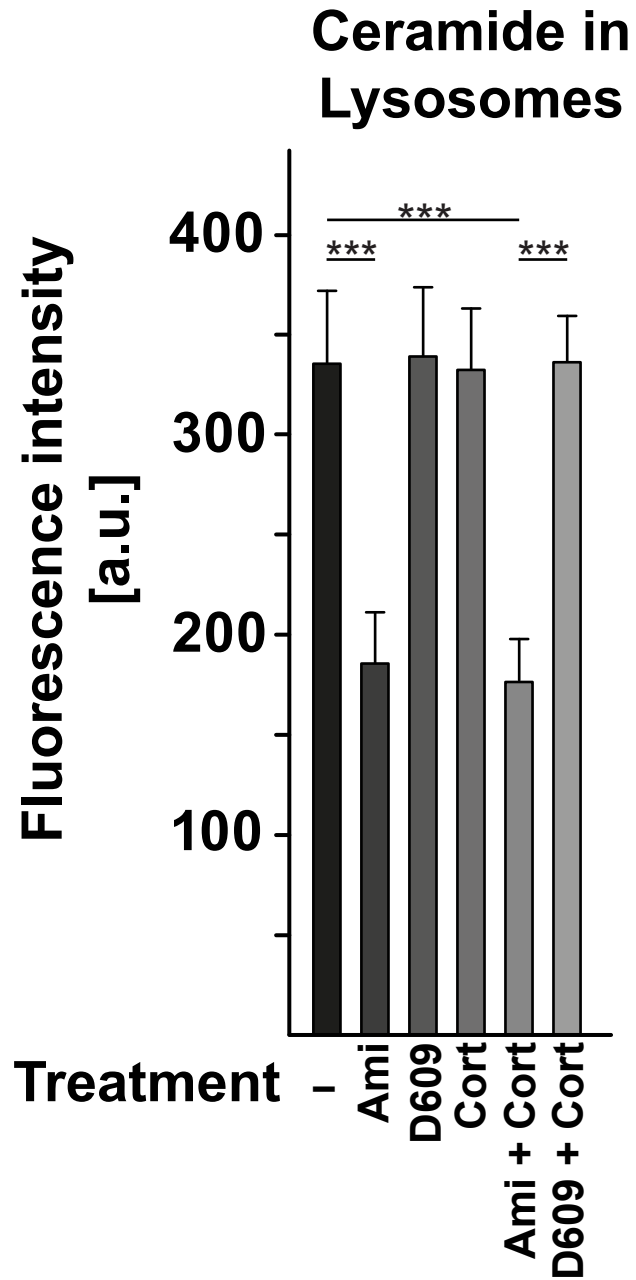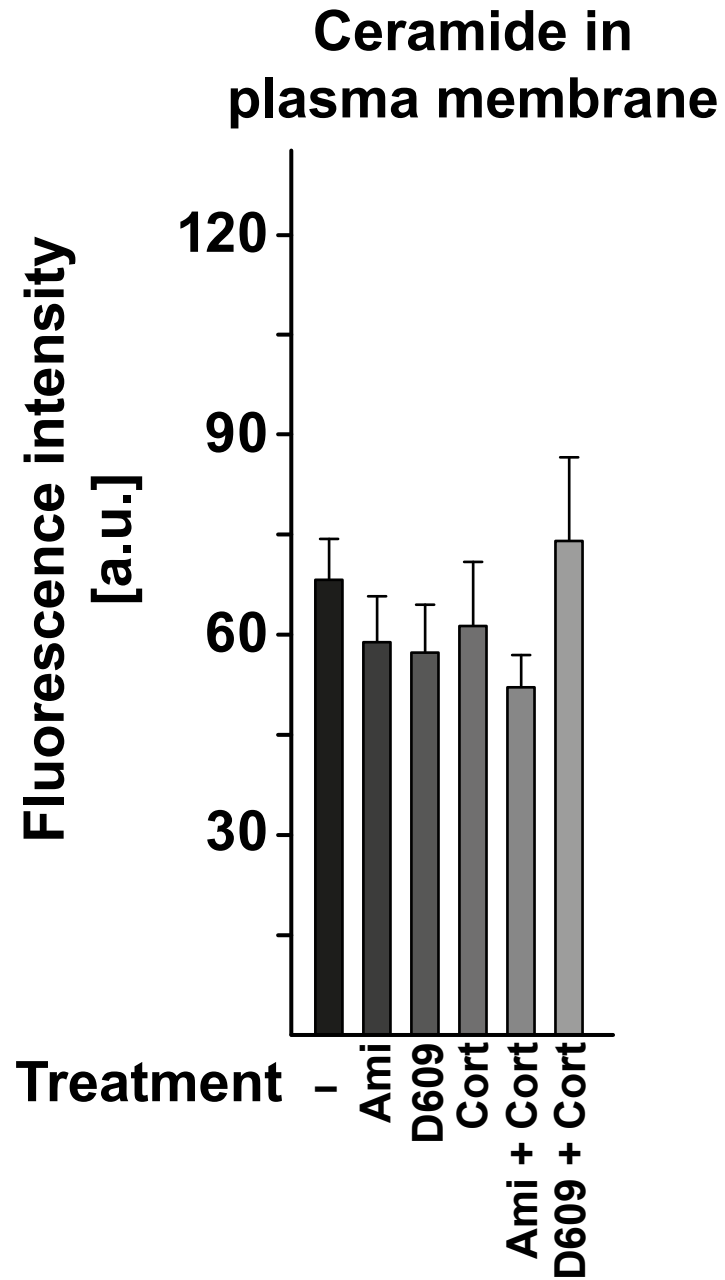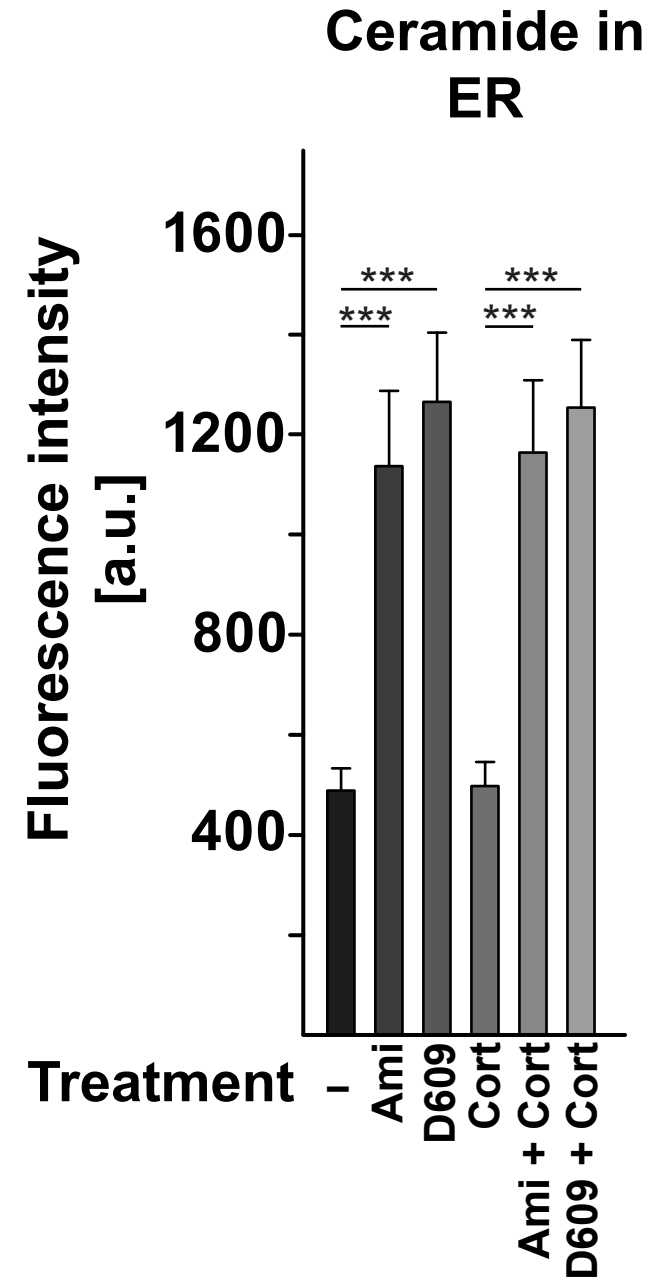

**Supplementary Fig. 10c**

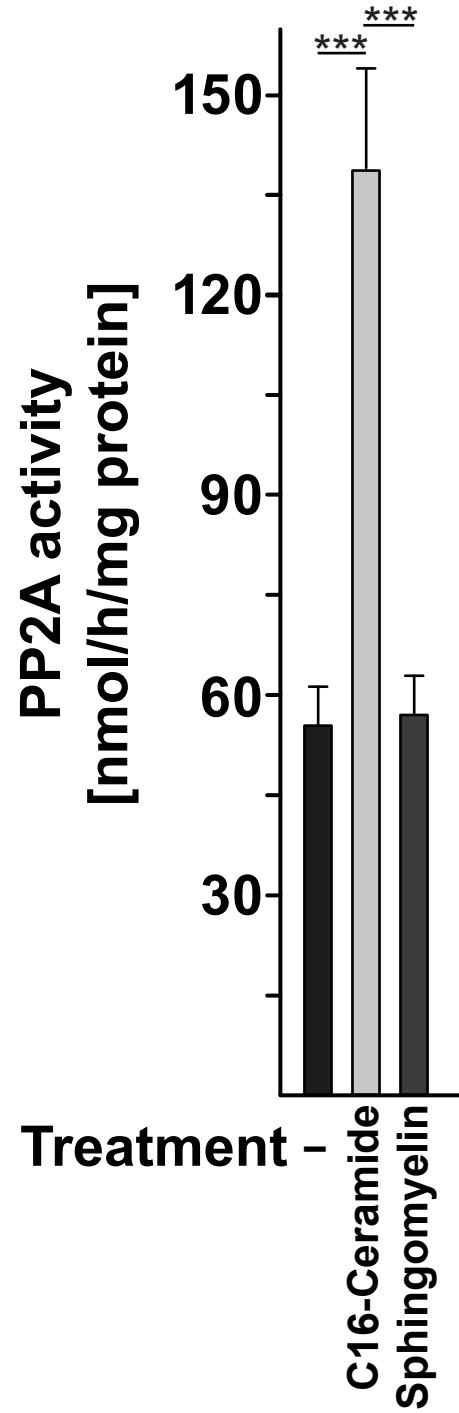

Supplementary Fig. 11

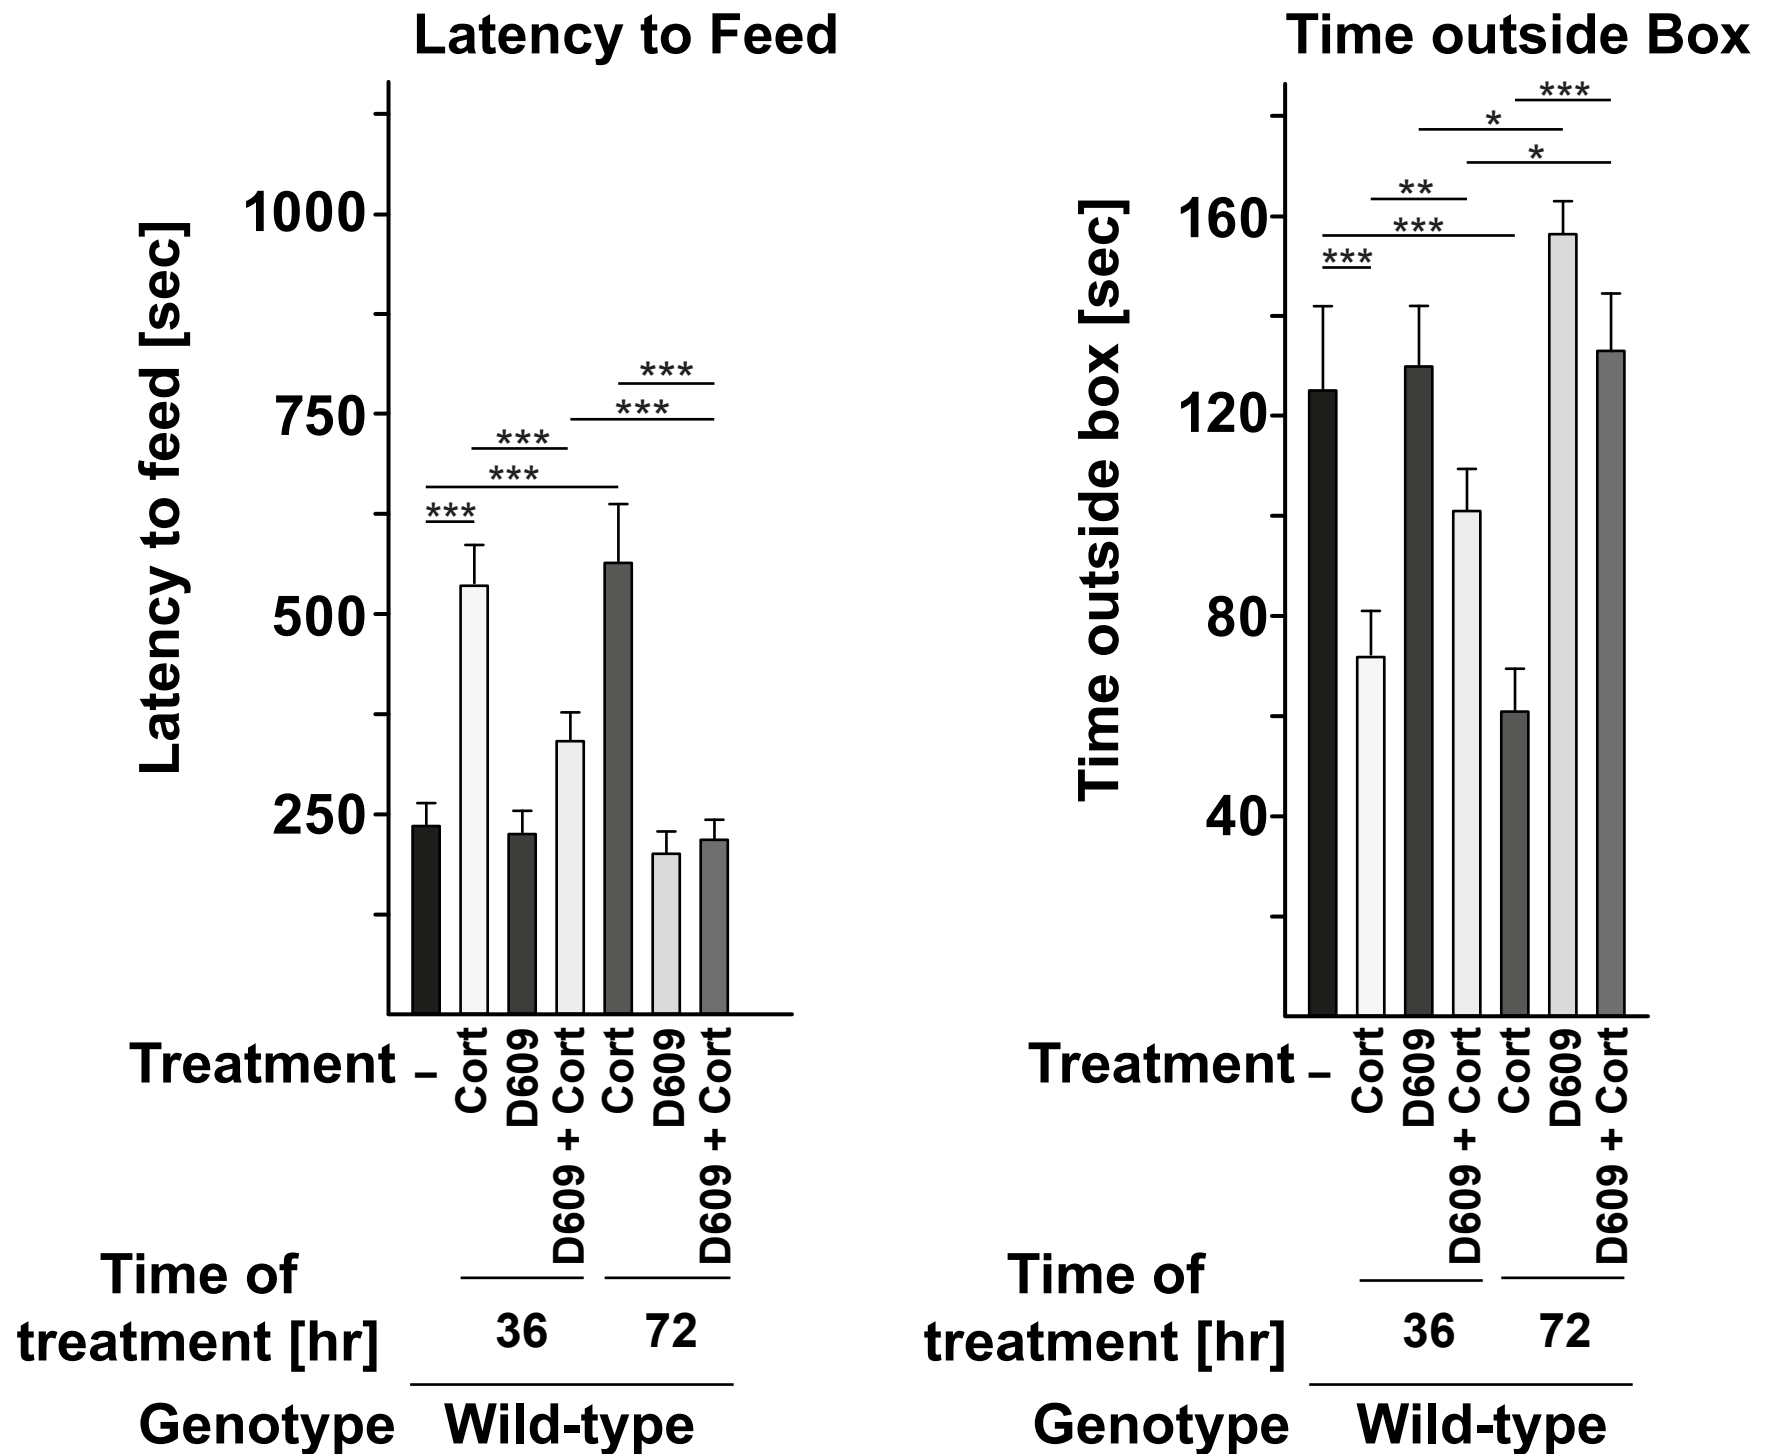

Supplement: 41380_2018_90_MOESM3_ESM.pdf [file 41380_2018_90_MOESM3_ESM.pdf]
