# Supplementary material for: Antidepressants act by inducing autophagy controlled by sphingomyelin–ceramide
Source: PubMed Central journal article supplement (PMC6294742; doi:10.1038/s41380-018-0090-9), 2018-07-23
Supplement: 41380_2018_90_MOESM1_ESM.pdf [file 41380_2018_90_MOESM1_ESM.pdf]

## Abbreviation list

ANOVA: Analysis of variance

Asm: Acid sphingomyelinase

BrdU: Bromodeoxyuridine

CUS: Chronic unpredictable environmental stress

D609: Tricyclodecan-9-yl-xanthogenate

ER: Endoplasmic reticulum

GFP: Green fluorescent protein

HDL: High-density lipoprotein

H/S: HEPES/Saline

IgG: Immunoglobulin

Lc3B: Microtubule-associated protein light-chain3

mTOR: Mammalian target of rapamycin

MDD: Major depressive disorder

P62: SQSTM1 (sequestosome 1

PBS: Phosphate buffered saline

PI3-K: Phosphatidylinositol 3-kinase

PFA: Paraformaldehyde

PP2A: Phosphatase 2A

RFP: Red fluorescent protein

Smpd1: Sphingomyelin phosphodiesterase 1

TEM: Transmission electron microscopy

Ulk: Unc-51 like autophagy activating kinase

Vps34: Phosphatidyl 3-kinase VPS34 (EC:2.7.1.137), Vacuolar protein sorting-associated protein 34

wt: Wildtype

## Legends:

Ami: Amitriptyline

Ap:Autophagosome

Aly: autophagolysosome

Ax: Myelin-surrounded axon

Cort: Corticosterone

Fluo: Fluoxetine

M: Mitochondria

N: Nucleus

OA: Okadaic acid

Sp: Spautin-1
